# Supplementary material for: Differential effects of two Zn sources (ZnO nanoparticles and ZnSO4) on lipid metabolism via the ferroptosis pathway and SLC7A11K23 acetylation by HDAC8 and HDAC6 in a freshwater teleost
Source: Royal Society of Chemistry journal article supplement (doi:10.1039/d4en00239c), 2024-01-01
Supplement: d4en00239c1.pdf [file d4en00239c1.pdf]

### Raw data

## **Two Zn sources (ZnO nanoparticles and ZnSO<sub>4</sub>) differentially affect lipid metabolism via ferroptosis pathway and SLC7A11<sup>K23</sup> acetylation by HDAC8 and HDAC6 in a freshwater teleost**

Yi-Chuang Xu,<sup>‡</sup><sup>a</sup> Hua Zheng,<sup>‡</sup><sup>a</sup> Xiao-Ying Tan,<sup>a</sup> Christer Hogstrand,<sup>c</sup> Tao Zhao,<sup>a</sup> Xiao-Lei Wei<sup>a</sup> and Zhi Luo<sup>\*ab</sup>

<sup>a</sup>Hubei Hongshan Laboratory, Fishery College, Huazhong Agricultural University, Wuhan 430070, China

<sup>b</sup>Laboratory for Marine Fisheries Science and Food Production Processes, Qingdao National Laboratory for Marine Science and Technology, Qingdao 266237, China

<sup>c</sup>Diabetes and Nutritional Sciences Division, School of Medicine, King's College London, Franklin-Wilkins Building, 150 Stamford Street, London SE1 9NH, UK

\*Corresponding author at: Zhi Luo, Hubei Hongshan Laboratory, Fishery College, Huazhong Agricultural University, Wuhan 430070, China, Tel.: +86-27-8728-2113; Fax: +86-27-8728-2114;

E-mail address: luozhi99@mail.hzau.edu.cn; luozhi99@aliyun.com (Z. Luo).

<sup>‡</sup> These two authors contributed equally.

**Fig. 1**

**Fig. 1A**

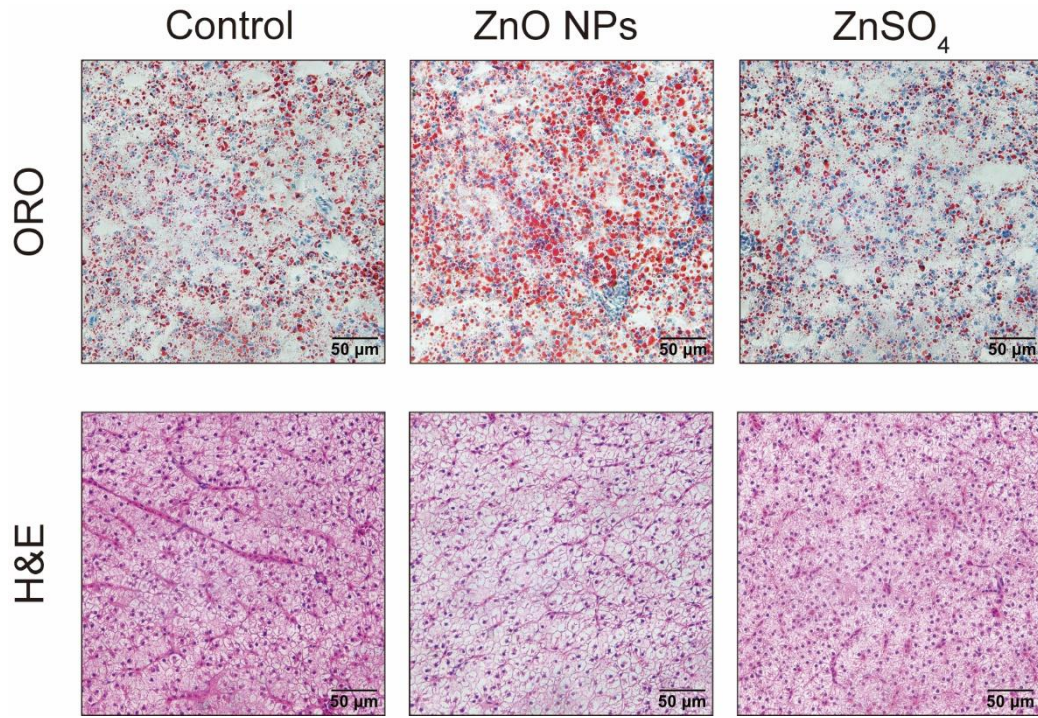

**Fig. 1B**

|     | Control  |          |          | ZnO NPs  |          |          | ZnSO <sub>4</sub> |          |          |
|-----|----------|----------|----------|----------|----------|----------|-------------------|----------|----------|
| ORO | 104.3632 | 93.47531 | 102.1615 | 126.8533 | 119.1429 | 131.2484 | 70.53249          | 74.14587 | 84.11147 |
| H&E | 94.32622 | 107.102  | 98.57183 | 127.7537 | 128.2744 | 129.2343 | 78.69475          | 79.89375 | 84.43586 |

**Fig. 1C**

|    | Control  |          |          | ZnO NPs  |         |          | ZnSO <sub>4</sub> |         |          |
|----|----------|----------|----------|----------|---------|----------|-------------------|---------|----------|
| TG | 1.033558 | 1.073225 | 1.120001 | 1.255237 | 1.39605 | 1.564342 | 0.793699          | 0.89046 | 0.827252 |

**Fig. 1D**

|      | Control  |          |          | ZnO NPs  |          |          | ZnSO <sub>4</sub> |          |          |
|------|----------|----------|----------|----------|----------|----------|-------------------|----------|----------|
| NEFA | 996.7976 | 1071.773 | 903.7281 | 2168.637 | 2709.909 | 2530.962 | 1723.371          | 1892.842 | 1985.981 |

**Fig. 1E**

|                | Control  |          |          | ZnO NPs  |          |          | ZnSO <sub>4</sub> |          |          |
|----------------|----------|----------|----------|----------|----------|----------|-------------------|----------|----------|
| <i>atgl</i>    | 1.002313 | 0.985094 | 1.012789 | 0.341116 | 0.374577 | 0.382447 | 1.221229          | 1.212793 | 1.359742 |
| <i>hsla</i>    | 1.138131 | 0.967053 | 0.908568 | 0.5328   | 0.53465  | 0.614152 | 1.528023          | 1.455653 | 1.316463 |
| <i>cpt1alb</i> | 0.974905 | 1.012789 | 1.012789 | 0.677519 | 0.703847 | 1.313425 | 0.839926          | 0.80571  | 0.961483 |
| <i>cpt1a2a</i> | 1.044877 | 1.012789 | 0.944965 | 0.581694 | 0.703847 | 0.544624 | 1.4323            | 1.412581 | 1.295342 |
| <i>acs1la</i>  | 1.214195 | 1.261377 | 0.65293  | 1.29684  | 1.433955 | 1.265757 | 0.560583          | 0.49827  | 0.50698  |
| <i>acadsb</i>  | 0.937354 | 1.043671 | 1.022192 | 0.624887 | 0.44648  | 0.512871 | 1.528023          | 1.415848 | 1.430646 |
| <i>acca</i>    | 0.909618 | 1.100633 | 0.998845 | 1.545778 | 1.52979  | 1.3692   | 0.405657          | 0.446996 | 0.398688 |
| <i>fas</i>     | 1.052145 | 1.005793 | 0.944965 | 1.493123 | 1.76949  | 1.650992 | 1.212793          | 0.938438 | 0.99539  |
| <i>elovl6</i>  | 1.011619 | 1.00812  | 0.980552 | 1.881218 | 1.914101 | 1.836128 | 0.429779          | 0.480186 | 0.39685  |
| <i>srebpl</i>  | 0.963707 | 1.00812  | 1.029302 | 0.85362  | 0.93088  | 0.997692 | 1.073012          | 1.103179 | 0.97041  |
| <i>ppara</i>   | 0.99539  | 1.070536 | 0.938438 | 0.397309 | 0.401461 | 0.364334 | 1.005793          | 0.887816 | 0.922316 |

**Fig. 2****Fig. 2A**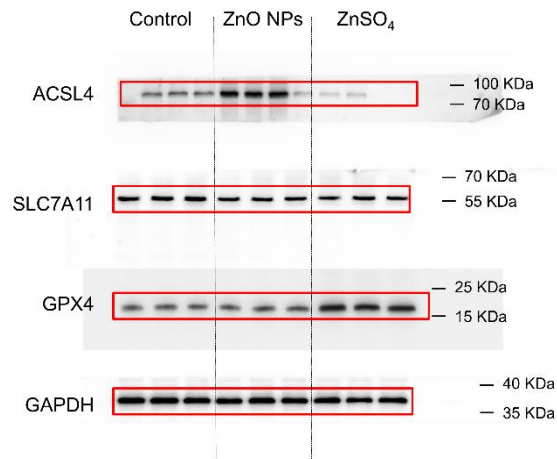**Fig. 2B**

|       | Control |         |         | ZnO NPs |         |         | ZnSO <sub>4</sub> |         |         |
|-------|---------|---------|---------|---------|---------|---------|-------------------|---------|---------|
| ACSL4 | 1       | 0.87601 | 0.75343 | 1.36699 | 1.74192 | 1.80161 | 0.4881            | 0.44473 | 0.46479 |

|         |   |         |         |         |         |         |         |         |         |
|---------|---|---------|---------|---------|---------|---------|---------|---------|---------|
| SLC7A11 | 1 | 0.7559  | 0.67197 | 0.58437 | 0.79468 | 0.8094  | 1.1727  | 0.97041 | 0.78578 |
| GPX4    | 1 | 0.72324 | 0.67162 | 0.87376 | 0.92936 | 0.83616 | 2.59254 | 2.25147 | 2.24975 |

**Fig. 2C**

|              | Control  |         |          | ZnO NPs  |          |          | ZnSO <sub>4</sub> |          |         |
|--------------|----------|---------|----------|----------|----------|----------|-------------------|----------|---------|
| <i>acs14</i> | 1.047294 | 0.99424 | 0.960373 | 2.087342 | 2.214018 | 2.009263 | 0.727827          | 0.758734 | 0.63581 |

**Fig. 2D**

|     | Control  |          |          | ZnO NPs |          |          | ZnSO <sub>4</sub> |          |          |
|-----|----------|----------|----------|---------|----------|----------|-------------------|----------|----------|
| Cys | 1.086983 | 1.148008 | 1.179255 | 0.80959 | 0.895072 | 0.949668 | 1.235312          | 1.347383 | 1.402978 |

**Fig. 2E**

|         | Control  |         |          | ZnO NPs  |          |          | ZnSO <sub>4</sub> |          |          |
|---------|----------|---------|----------|----------|----------|----------|-------------------|----------|----------|
| Reduced |          |         |          |          |          |          |                   |          |          |
| GSH     | 99.27469 | 111.917 | 88.80833 | 64.30327 | 60.16761 | 38.73422 | 153.9915          | 138.8916 | 121.6833 |

**Fig. 2F**

|      | Control  |          |          | ZnO NPs  |          |          | ZnSO <sub>4</sub> |          |          |
|------|----------|----------|----------|----------|----------|----------|-------------------|----------|----------|
| GSH: |          |          |          |          |          |          |                   |          |          |
| GSSG | 5.074794 | 4.758245 | 5.098925 | 7.212806 | 6.970724 | 7.990305 | 5.202281          | 6.028979 | 4.952163 |

**Fig. 2G**

|             | Control  |          |          | ZnO NPs  |          |          | ZnSO <sub>4</sub> |          |          |
|-------------|----------|----------|----------|----------|----------|----------|-------------------|----------|----------|
| <i>cbsa</i> | 0.96929  | 1.231144 | 0.837987 | 1.197479 | 0.929805 | 0.90125  | 1.351911          | 0.989657 | 0.91067  |
| <i>cbsb</i> | 0.828362 | 1.081725 | 1.115997 | 0.915945 | 1.063141 | 1.104454 | 1.026927          | 1.4323   | 0.985094 |
| <i>cth</i>  | 1.060688 | 1.197479 | 0.787308 | 0.864537 | 1.287882 | 0.876606 | 0.91067           | 1.098093 | 0.815072 |
| <i>gclc</i> | 0.929805 | 0.933033 | 1.152686 | 0.406126 | 0.367292 | 0.296273 | 0.952638          | 0.694959 | 0.635075 |
| <i>gclm</i> | 1.008120 | 0.983957 | 1.008120 | 0.405189 | 0.398228 | 0.432768 | 1.091768          | 1.087991 | 0.953739 |
| <i>gss</i>  | 0.881684 | 0.948246 | 1.196096 | 1.341022 | 1.281944 | 0.925518 | 1.350350          | 1.364463 | 1.383510 |

|             |          |          |          |          |          |          |          |          |          |
|-------------|----------|----------|----------|----------|----------|----------|----------|----------|----------|
| <i>gpx4</i> | 1.019833 | 1.016305 | 0.964821 | 1.089249 | 0.875594 | 0.780967 | 1.472567 | 1.442262 | 1.273089 |
| <i>gsr</i>  | 0.927659 | 1.040060 | 1.036462 | 0.730353 | 1.267220 | 1.258466 | 1.245450 | 1.339474 | 1.293847 |

**Fig. 2H**

|     | Control  |          |          | ZnO NPs  |          |          | ZnSO <sub>4</sub> |          |          |
|-----|----------|----------|----------|----------|----------|----------|-------------------|----------|----------|
| MDA | 6.186559 | 5.830637 | 5.610867 | 7.773924 | 7.372122 | 7.067338 | 4.820292          | 5.365986 | 5.415312 |

**Fig. 2I**

|       | Control  |          |          | ZnO NPs  |          |          | ZnSO <sub>4</sub> |          |          |
|-------|----------|----------|----------|----------|----------|----------|-------------------|----------|----------|
| 4-HNE | 6.186559 | 5.830637 | 5.610867 | 7.773924 | 7.372122 | 7.067338 | 4.820292          | 5.365986 | 5.415312 |

**Fig. 2J**

|              | Control  |         |          | ZnO NPs  |          |          | ZnSO <sub>4</sub> |          |         |
|--------------|----------|---------|----------|----------|----------|----------|-------------------|----------|---------|
| <i>ptgs2</i> | 1.105731 | 0.97942 | 0.923382 | 1.474269 | 1.244012 | 1.265757 | 0.787308          | 0.820742 | 0.78187 |

**Fig. 3**

**Fig. 3A**

|     | Cell viability, % |          |          |          |          |          |  |
|-----|-------------------|----------|----------|----------|----------|----------|--|
| 0   | 99.99999          | 100.8474 | 101.7484 | 99.58051 | 102.2411 | 95.58265 |  |
| 0.1 | 101.3244          | 100.5803 | 101.4788 | 99.31669 | 101.9702 | 95.32942 |  |
| 0.2 | 76.9234           | 100.2573 | 97.91272 | 94.96439 | 94.10797 | 84.84178 |  |
| 0.4 | 66.56212          | 84.61714 | 89.9101  | 93.19539 | 87.94455 | 87.50932 |  |
| 0.6 | 85.54377          | 84.96814 | 83.90112 | 82.17424 | 54.55819 | 69.52449 |  |
| 0.8 | 79.59094          | 76.19334 | 68.65403 | 66.82887 | 66.67444 | 73.56792 |  |
| 1   | 70.24051          | 66.42172 | 70.50727 | 74.91572 | 47.2014  | 53.23846 |  |
| 2   | 42.96142          | 34.97284 | 27.09658 | 18.06907 | 20.2031  | 39.97096 |  |
| 3   | 31.96835          | 21.21396 | 17.78828 | 19.5292  | 13.07094 | 24.87831 |  |
| 4   | 25.49606          | 24.70983 | 21.52283 | 22.08441 | 20.55409 | 23.76917 |  |

**Fig. 3B**

|                   |     | Cell viability, % |          |          |          |          |          |
|-------------------|-----|-------------------|----------|----------|----------|----------|----------|
| Control           |     | 96.80647          | 99.34962 | 101.184  | 104.486  | 100.8505 | 97.32344 |
|                   | 25  | 99.31627          | 102.1346 | 111.4567 | 96.78979 | 96.33953 | 96.58134 |
| ZnO               | 50  | 106.3787          | 104.4609 | 93.86308 | 94.30501 | 68.0647  | 106.9207 |
| NPs               | 75  | 89.28542          | 100.5003 | 97.04828 | 97.69032 | 100.7421 | 106.337  |
|                   | 100 | 88.88518          | 91.04477 | 89.04361 | 75.32728 | 90.57784 | 91.89527 |
|                   | 25  | 102.293           | 95.3056  | 109.4055 | 107.1208 | 102.3764 | 103.6355 |
|                   | 50  | 102.7349          | 102.4514 | 95.48904 | 109.6139 | 109.9308 | 109.8891 |
| ZnSO <sub>4</sub> | 75  | 95.78921          | 97.18169 | 107.7295 | 107.6378 | 99.30793 | 110.2226 |
|                   | 100 | 100.8588          | 110.306  | 111.957  | 96.03102 | 97.62361 | 108.2048 |

**Fig. 3C**

|                         |  | Cell viability, % |          |          |          |          |          |
|-------------------------|--|-------------------|----------|----------|----------|----------|----------|
| Control                 |  | 95.92719          | 91.44749 | 110.2313 | 112.3012 | 99.48005 | 90.61335 |
| ZnO NPs                 |  | 85.57756          | 79.33688 | 79.76941 | 78.47184 | 83.97105 | 88.6979  |
| ZnSO <sub>4</sub>       |  | 108.3838          | 99.31557 | 103.4315 | 94.00617 | 96.01716 | 99.40014 |
| ZnO NPs+Fer-1           |  | 90.24262          | 90.05725 | 93.05401 | 92.55969 | 94.38247 | 120.4883 |
| ZnSO <sub>4</sub> +RSL3 |  | 77.49534          | 79.86343 | 76.33009 | 87.00528 | 74.68558 | 80.88771 |

**Fig. 3D**

|                         |  | MDA      |          |          |          |          |          |
|-------------------------|--|----------|----------|----------|----------|----------|----------|
| Control                 |  | 2.152468 | 1.853738 | 1.731632 | 1.899635 | 1.917601 | 2.070739 |
| ZnO NPs                 |  | 2.84723  | 2.782328 | 2.869924 | 3.001828 | 3.334086 | 2.408523 |
| ZnSO <sub>4</sub>       |  | 1.733383 | 1.739168 | 1.636188 | 1.742329 | 1.860889 | 1.608162 |
| ZnO NPs+Fer-1           |  | 1.739574 | 1.869964 | 1.777217 | 1.782864 | 2.152605 | 2.106166 |
| ZnSO <sub>4</sub> +RSL3 |  | 2.166734 | 2.546513 | 1.8706   | 1.850025 | 1.83049  | 2.202484 |

**Fig. 3E**

|                         | 4-HNE    |          |          |          |
|-------------------------|----------|----------|----------|----------|
| Control                 | 107.2205 | 92.98227 | 106.9442 | 92.85309 |
| ZnO NPs                 | 115.4999 | 129.243  | 141.393  | 142.0959 |
| ZnSO <sub>4</sub>       | 85.80792 | 89.61116 | 85.81996 | 74.94378 |
| ZnO NPs+Fer-1           | 90.78713 | 95.49242 | 102.0275 | 91.26217 |
| ZnSO <sub>4</sub> +RSL3 | 96.88998 | 104.9899 | 93.80553 | 98.04482 |

**Fig. 3F**

|                         | C11-BODIPY |          |          |          |
|-------------------------|------------|----------|----------|----------|
| Control                 | 95.99476   | 105.5668 | 96.70998 | 101.7285 |
| ZnO NPs                 | 160.7343   | 160.7462 | 161.1873 | 149.4934 |
| ZnSO <sub>4</sub>       | 71.45071   | 66.32495 | 87.126   | 77.32745 |
| ZnO NPs+Fer-1           | 50.85231   | 71.96329 | 60.36476 | 53.54631 |
| ZnSO <sub>4</sub> +RSL3 | 175.9208   | 176.8626 | 189.5458 | 191.2266 |

**Fig. 3G**

|                         | TG       |          |          |          |          |          |
|-------------------------|----------|----------|----------|----------|----------|----------|
| Control                 | 0.035733 | 0.03686  | 0.035884 | 0.040361 | 0.042164 | 0.037249 |
| ZnO NPs                 | 0.057416 | 0.054899 | 0.065479 | 0.055365 | 0.067106 | 0.057545 |
| ZnSO <sub>4</sub>       | 0.036629 | 0.025589 | 0.036827 | 0.03545  | 0.024342 | 0.028289 |
| ZnO NPs+Fer-1           | 0.057056 | 0.039631 | 0.039821 | 0.024018 | 0.039138 | 0.027954 |
| ZnSO <sub>4</sub> +RSL3 | 0.043712 | 0.044383 | 0.04353  | 0.047968 | 0.051444 | 0.04672  |

**Fig. 3H**

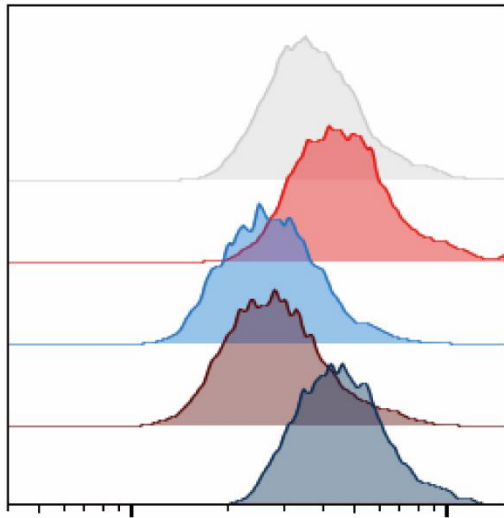

**Fig. 3I**

| BODIPY 493/503          |          |          |          |          |
|-------------------------|----------|----------|----------|----------|
| Control                 | 101.2996 | 100.8841 | 99.39403 | 98.42232 |
| ZnO NPs                 | 124.4161 | 122.0529 | 123.1428 | 105.4308 |
| ZnSO <sub>4</sub>       | 76.22565 | 75.53731 | 73.96412 | 74.27853 |
| ZnO NPs+Fer-1           | 72.11184 | 76.45093 | 73.96982 | 72.12864 |
| ZnSO <sub>4</sub> +RSL3 | 124.6232 | 123.6016 | 124.3734 | 115.7923 |

**Fig. 4**

**Fig. 4A**

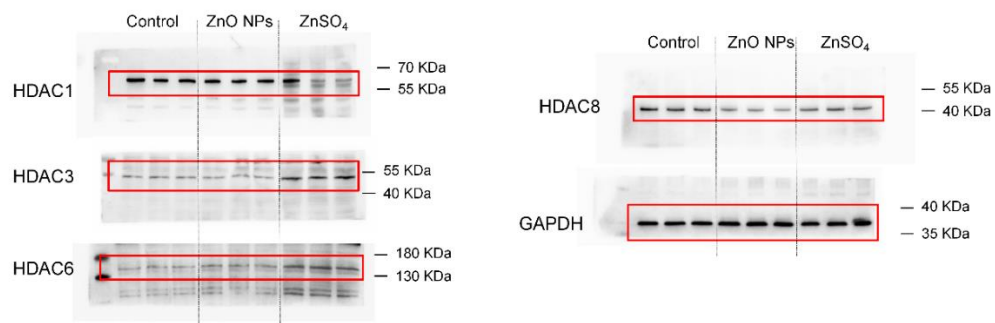



**Fig. 4B**

|       |   | Control |         | ZnO NPs |         |         | ZnSO <sub>4</sub> |         |         |
|-------|---|---------|---------|---------|---------|---------|-------------------|---------|---------|
| HDAC1 | 1 | 0.75828 | 0.89413 | 0.86048 | 0.7897  | 0.87063 | 1.12006           | 0.60826 | 0.43779 |
| HDAC3 | 1 | 1.11299 | 1.19716 | 1.01323 | 0.97224 | 0.98399 | 2.43126           | 2.06114 | 2.99985 |
| HDAC6 | 1 | 1.03172 | 0.76331 | 1.14603 | 1.09149 | 1.10697 | 1.54469           | 1.82498 | 1.69284 |
| HDAC8 | 1 | 0.90941 | 0.74239 | 0.50429 | 0.40589 | 0.35026 | 0.62488           | 0.73119 | 0.6625  |

**Fig. 4C**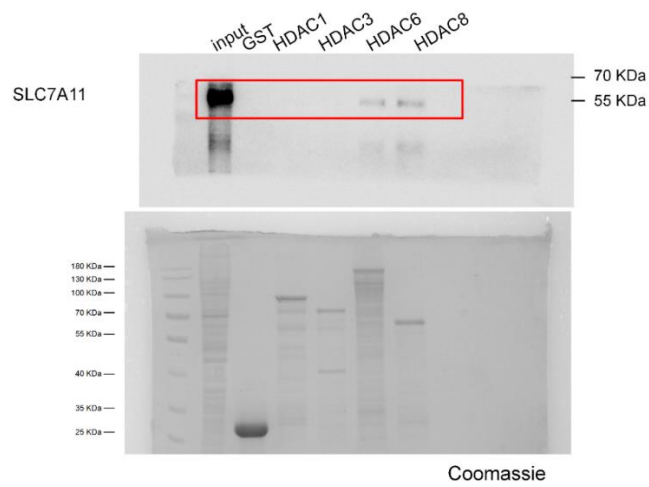**Fig. 4D**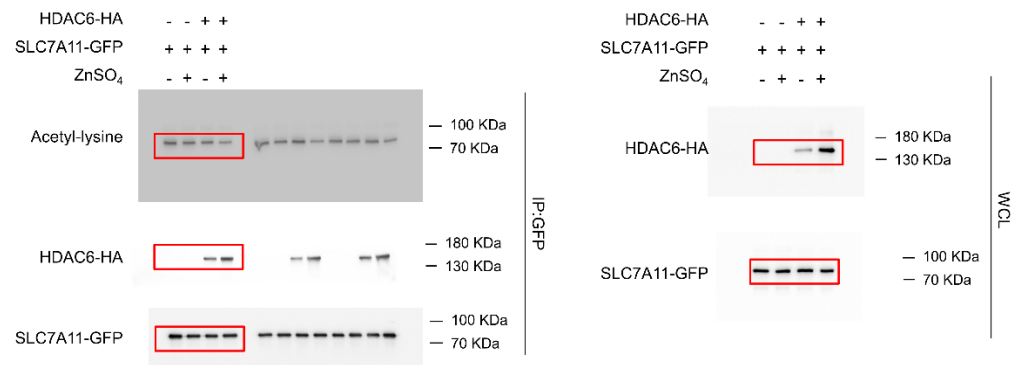

**Fig. 4E**

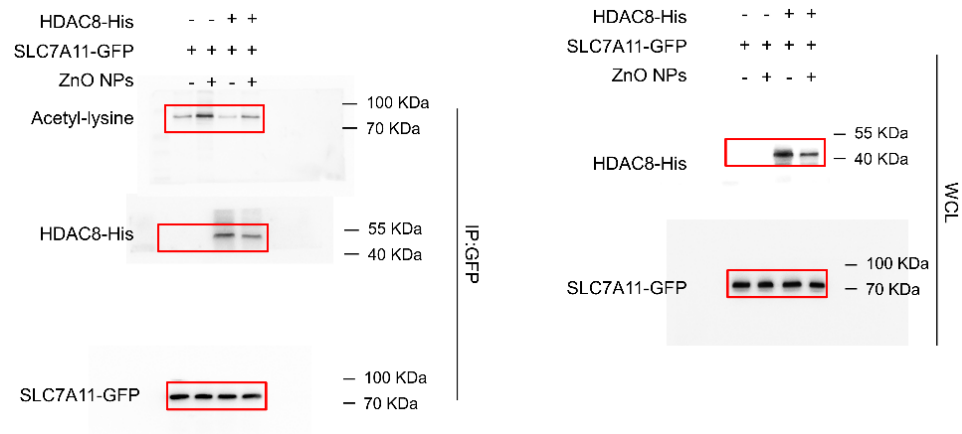

**Fig. 4F**

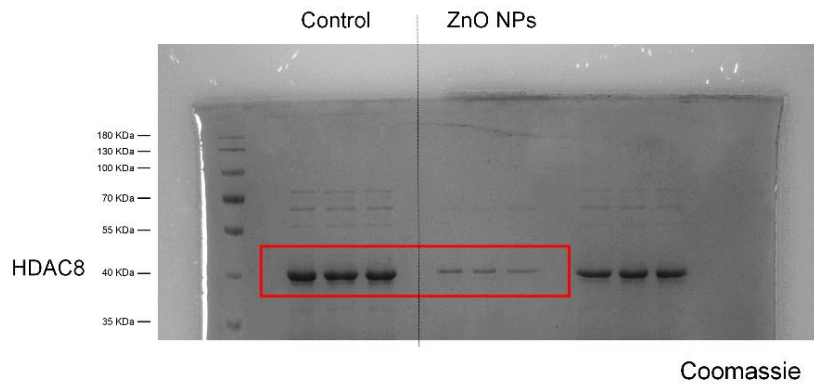

**Fig. 4G**

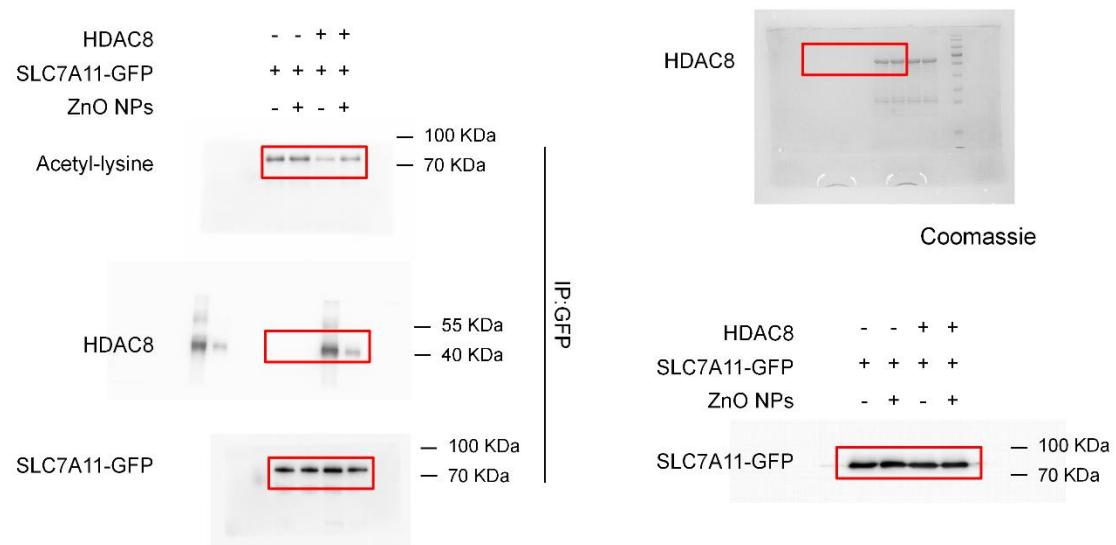

**Fig. 4H**

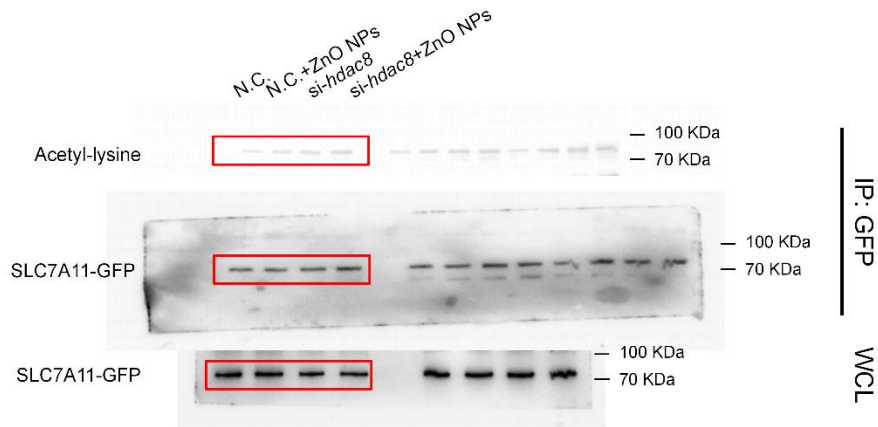

**Fig. 4I**

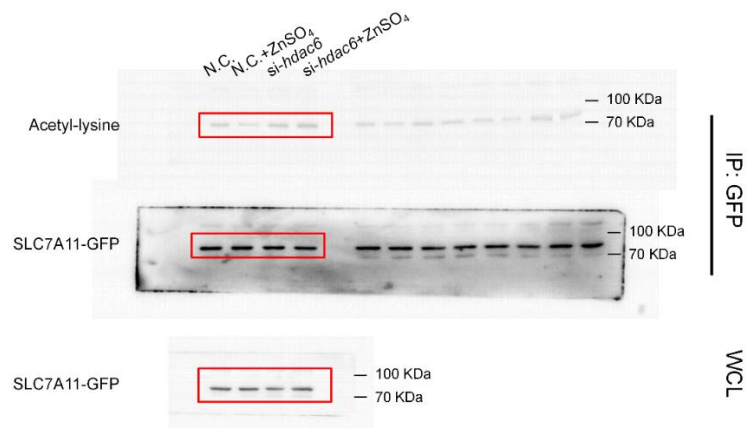

**Fig. 5**

**Fig. 5A**

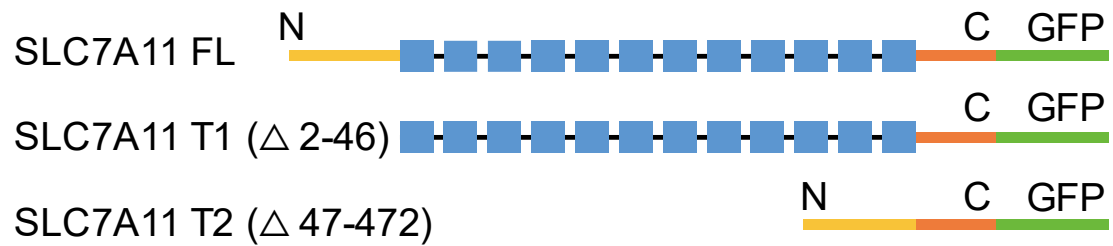

**Fig. 5B**

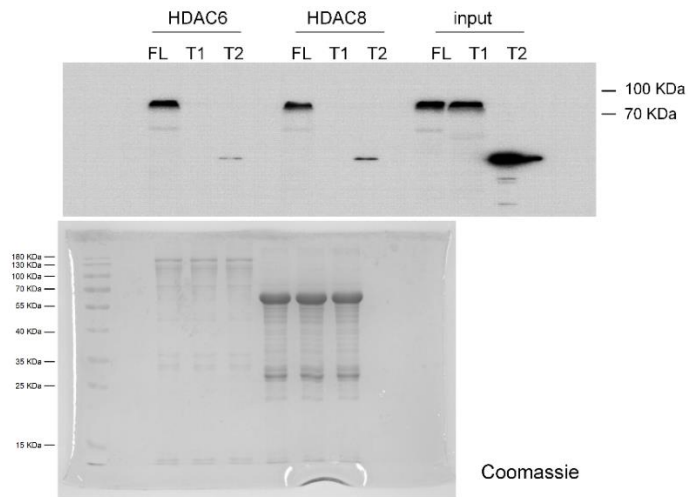

**Fig. 5C**

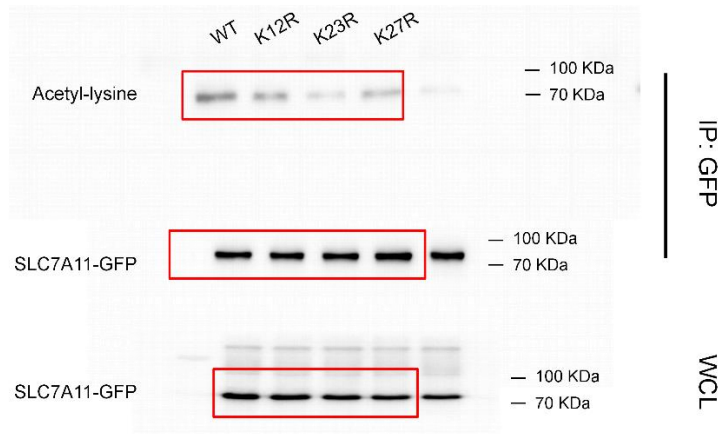

**Fig. 5D**

| WT       | K12R   | K23R     | K27R    |
|----------|--------|----------|---------|
| 100      | 100    | 110.672  | 137.789 |
| 83.884   | 57.387 | 79.60533 | 132.395 |
| 66.66667 | 31.883 | 30.987   | 62.141  |
| 103.6587 | 65.321 | 50.072   | 108.085 |

**Fig. 5E**

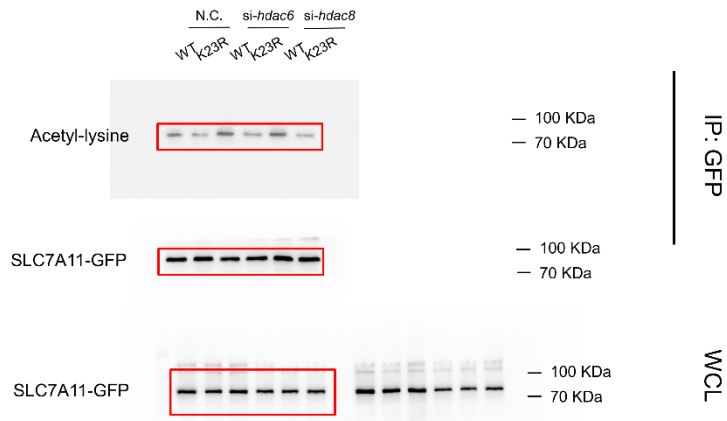

**Fig. 5F**

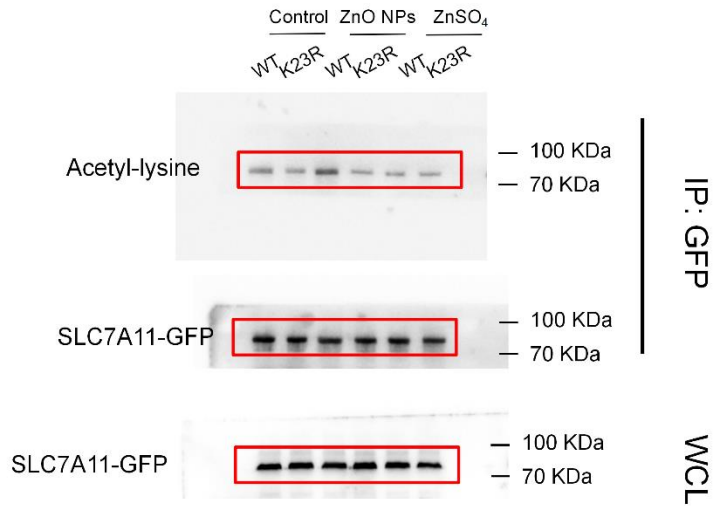

**Fig. 6**

**Fig. 6A**

|         |      | Cell viability |          |          |          |          |          |
|---------|------|----------------|----------|----------|----------|----------|----------|
| Control | WT   | 96.76725       | 100.2593 | 94.31787 | 104.2644 | 104.4961 | 99.89519 |
|         | K23R | 101.5171       | 106.1841 | 107.5412 | 106.813  | 90.80929 | 104.7112 |
| ZnO NPs | WT   | 76.49363       | 76.26193 | 84.75203 | 85.03338 | 87.84686 | 83.94108 |
|         | K23R | 93.65587       | 91.90159 | 87.15176 | 92.48083 | 87.76411 | 90.23005 |
| RSL3    | WT   | 81.50825       | 84.66928 | 73.91184 | 82.76604 | 74.73934 | 76.59292 |

|      |          |          |         |          |        |          |
|------|----------|----------|---------|----------|--------|----------|
| K23R | 88.83985 | 84.38793 | 89.8163 | 80.48215 | 89.386 | 82.96464 |
|------|----------|----------|---------|----------|--------|----------|

**Fig. 6B**

|                   |      | Cystine uptake |          |          |          |          |          |
|-------------------|------|----------------|----------|----------|----------|----------|----------|
| Control           | WT   | 0.145486       | 0.142442 | 0.13691  | 0.115992 | 0.130366 | 0.181679 |
|                   | K23R | 0.186679       | 0.177792 | 0.216002 | 0.184996 | 0.199953 | 0.211332 |
| ZnO               | WT   | 0.066977       | 0.097151 | 0.095015 | 0.115081 | 0.102338 | 0.073463 |
| NPs               | K23R | 0.145332       | 0.174911 | 0.135226 | 0.134801 | 0.141005 | 0.107208 |
| ZnSO <sub>4</sub> | WT   | 0.196052       | 0.193396 | 0.192353 | 0.201588 | 0.192353 | 0.150586 |
|                   | K23R | 0.200571       | 0.192399 | 0.226808 | 0.202911 | 0.19317  | 0.20583  |

**Fig. 6C**

|             |                   |      | Relative expression |          |          |          |
|-------------|-------------------|------|---------------------|----------|----------|----------|
| <i>gclc</i> | Control           | WT   | 1.084853            | 0.970971 | 0.931418 | 1.019244 |
|             |                   | K23R | 1.523617            | 1.285652 | 1.539541 | 1.37316  |
|             | ZnO NPs           | WT   | 0.557676            | 0.60395  | 0.599778 | 0.551908 |
|             |                   | K23R | 1.199556            | 1.354256 | 1.487098 | 1.303599 |
|             | ZnSO <sub>4</sub> | WT   | 0.761808            | 0.967612 | 0.61664  | 1.246169 |
|             |                   | K23R | 1.555631            | 1.37316  | 1.340248 | 1.250496 |
| <i>gclm</i> | Control           | WT   | 1.022783            | 1.008702 | 1.001734 | 0.967612 |
|             |                   | K23R | 1.416666            | 1.162717 | 1.154686 | 1.57189  |
|             | ZnO NPs           | WT   | 0.427057            | 0.478802 | 0.516736 | 0.561555 |
|             |                   | K23R | 0.905948            | 1.022783 | 1.212093 | 1.138789 |
|             | ZnSO <sub>4</sub> | WT   | 1.285652            | 1.290115 | 0.627419 | 1.029897 |
|             |                   | K23R | 1.183041            | 1.358957 | 1.392329 | 1.471717 |
| <i>gss</i>  | Control           | WT   | 1.152686            | 0.982821 | 0.989657 | 0.891929 |
|             |                   | K23R | 1.075494            | 1.148698 | 1.172835 | 1.136817 |
|             | ZnO NPs           | WT   | 0.709562            | 0.835088 | 0.858565 | 1.042466 |
|             |                   | K23R | 0.757858            | 0.719467 | 0.687771 | 0.952638 |

|                   |                   |          |          |          |          |          |          |
|-------------------|-------------------|----------|----------|----------|----------|----------|----------|
| <i>gpx4</i>       | ZnSO <sub>4</sub> | WT       | 1.71119  | 1.681793 | 1.670176 | 1.872544 |          |
|                   |                   | K23R     | 1.808759 | 1.783857 | 1.474269 | 1.180993 |          |
|                   | Control           | WT       | 1.069918 | 1.099997 | 0.970971 | 0.875088 |          |
|                   |                   | K23R     | 1.492261 | 1.23328  | 1.436442 | 1.402013 |          |
|                   | ZnO NPs           | WT       | 0.964264 | 0.836536 | 0.890384 | 0.866037 |          |
|                   |                   | K23R     | 1.377928 | 1.14671  | 1.267952 | 1.199556 |          |
|                   | ZnSO <sub>4</sub> | WT       | 1.290115 | 1.33099  | 1.33099  | 1.20372  |          |
|                   |                   | K23R     | 1.392329 | 1.492261 | 1.33099  | 1.732073 |          |
|                   | Control           | WT       | 0.959264 | 0.965936 | 0.993092 | 1.086735 |          |
|                   |                   | K23R     | 1.164734 | 1.209994 | 1.287882 | 1.319508 |          |
|                   | <i>gsr</i>        | ZnO NPs  | WT       | 0.806642 | 1.060688 | 0.929805 | 0.861546 |
|                   |                   |          | K23R     | 1.235419 | 1.140764 | 1.201636 | 1.201636 |
| ZnSO <sub>4</sub> | WT                | 1.239708 | 1.105731 | 1.209994 | 1.301342 |          |          |
|                   | K23R              | 1.265757 | 1.283426 | 1.342573 | 1.252664 |          |          |

**Fig. 6D**

|                   |      | Reduced GSH |          |          |
|-------------------|------|-------------|----------|----------|
| Control           | WT   | 103.6975    | 96.18015 | 100.1223 |
|                   | K23R | 127.3139    | 126.233  | 124.0345 |
| ZnO NPs           | WT   | 68.66277    | 70.87017 | 72.97748 |
|                   | K23R | 97.39783    | 100.0979 | 114.8435 |
| ZnSO <sub>4</sub> | WT   | 117.4423    | 131.5318 | 123.4918 |
|                   | K23R | 127.6508    | 132.7017 | 132.288  |

**Fig. 6E**

|         |      | MDA      |          |          |          |
|---------|------|----------|----------|----------|----------|
| Control | WT   | 2.000662 | 2.192151 | 2.297818 | 2.494457 |
|         | K23R | 1.477955 | 1.541081 | 1.455004 | 1.785388 |
| ZnO NPs | WT   | 3.471696 | 2.709948 | 3.308911 | 2.953441 |

|                   |      |          |          |          |          |
|-------------------|------|----------|----------|----------|----------|
|                   | K23R | 1.252156 | 1.30795  | 1.308716 | 1.906647 |
| ZnSO <sub>4</sub> | WT   | 1.590691 | 1.513302 | 1.70402  | 1.559604 |
|                   | K23R | 1.169716 | 1.092287 | 1.23439  | 1.509283 |

**Fig. 6F**

|                   |      | 4-HNE    |          |          |          |
|-------------------|------|----------|----------|----------|----------|
| Control           | WT   | 103.1402 | 107.3318 | 85.77514 | 103.7529 |
|                   | K23R | 79.07667 | 79.80761 | 80.1683  | 72.51685 |
| ZnO NPs           | WT   | 129.9416 | 124.2915 | 134.147  | 141.026  |
|                   | K23R | 78.10814 | 95.70568 | 73.29907 | 64.25267 |
| ZnSO <sub>4</sub> | WT   | 70.23481 | 82.71337 | 71.87335 | 72.20847 |
|                   | K23R | 75.68318 | 67.51806 | 77.27275 | 61.24713 |

**Fig. 6G**

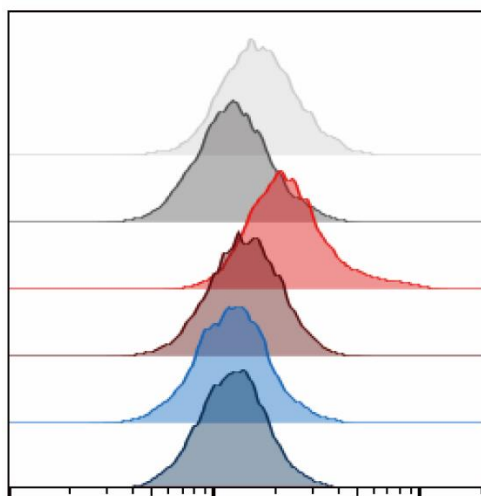

**Fig. 6H**

|         |      | C11-BODIPY |          |          |          |
|---------|------|------------|----------|----------|----------|
| Control | WT   | 97.38725   | 99.23297 | 103.8382 | 99.5416  |
|         | K23R | 70.96023   | 72.46706 | 71.94663 | 75.48072 |
| ZnO NPs | WT   | 119.5782   | 141.6542 | 141.7692 | 142.4832 |
|         | K23R | 81.93165   | 104.1589 | 74.42775 | 78.41571 |



|                   |      |          |          |          |          |
|-------------------|------|----------|----------|----------|----------|
| ZnSO <sub>4</sub> | WT   | 71.05705 | 71.051   | 70.81499 | 73.97389 |
|                   | K23R | 52.03104 | 57.30193 | 60.91469 | 70.30666 |

**Fig. 6I**

|                   |      | <i>ptgs2</i> |          |          |          |
|-------------------|------|--------------|----------|----------|----------|
| Control           | WT   | 1.193336     | 0.976032 | 1.01748  | 0.843816 |
|                   | K23R | 0.600818     | 0.598739 | 0.757858 | 0.630689 |
| ZnO NPs           | WT   | 1.664397     | 1.94531  | 1.892115 | 1.918528 |
|                   | K23R | 1.132884     | 1.333299 | 1.356604 | 1.172835 |
| ZnSO <sub>4</sub> | WT   | 0.765779     | 0.757858 | 0.726986 | 0.744839 |
|                   | K23R | 0.515842     | 0.534033 | 0.510506 | 0.80107  |

**Fig. 6J**

|                   |      | TG       |          |          |          |          |          |
|-------------------|------|----------|----------|----------|----------|----------|----------|
| Control           | WT   | 0.049867 | 0.04908  | 0.0423   | 0.037546 | 0.045113 | 0.054747 |
|                   | K23R | 0.041824 | 0.030602 | 0.036301 | 0.029101 | 0.04053  | 0.028184 |
| ZnO NPs           | WT   | 0.078096 | 0.069355 | 0.065715 | 0.054734 | 0.085365 | 0.065959 |
|                   | K23R | 0.043118 | 0.045943 | 0.047949 | 0.039589 | 0.046284 | 0.047555 |
| ZnSO <sub>4</sub> | WT   | 0.040528 | 0.042108 | 0.037938 | 0.033444 | 0.036591 | 0.045707 |
|                   | K23R | 0.03793  | 0.028165 | 0.033307 | 0.033204 | 0.039067 | 0.026095 |

**Fig. 6K**

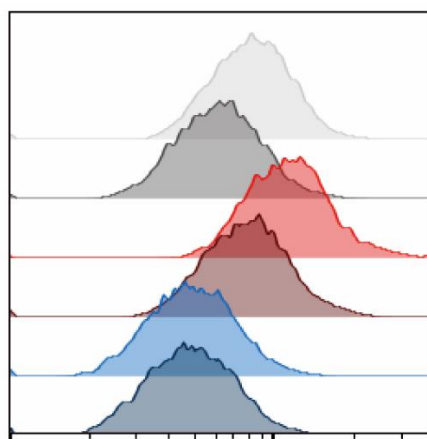

**Fig. 6L**

|                   |      | BODIPY 493/503 |          |          |          |
|-------------------|------|----------------|----------|----------|----------|
| Control           | WT   | 116.3912       | 94.58849 | 95.33355 | 93.68671 |
|                   | K23R | 85.66174       | 71.7318  | 71.1459  | 70.66689 |
| ZnO NPs           | WT   | 126.1          | 128.6466 | 125.4682 | 141.5111 |
|                   | K23R | 90.55641       | 89.03974 | 91.10641 | 104.0172 |
| ZnSO <sub>4</sub> | WT   | 90.55641       | 70.07386 | 70.73297 | 89.03974 |
|                   | K23R | 57.38063       | 69.10741 | 56.61229 | 56.19631 |

**Fig. 6M**

|                |                   |      | Relative expression |          |          |          |
|----------------|-------------------|------|---------------------|----------|----------|----------|
| <i>atgl</i>    | Control           | WT   | 0.936272            | 0.982821 | 1.010451 | 1.075494 |
|                |                   | K23R | 1.274561            | 1.244012 | 1.526259 | 1.394744 |
|                | ZnO NPs           | WT   | 0.787308            | 0.817902 | 0.784584 | 0.755236 |
|                |                   | K23R | 1.176907            | 1.156688 | 1.021012 | 1.641483 |
|                | ZnSO <sub>4</sub> | WT   | 1.342573            | 1.474269 | 1.505247 | 1.337928 |
|                |                   | K23R | 1.500039            | 1.664397 | 1.670176 | 1.892115 |
| <i>hsla</i>    | Control           | WT   | 1.084853            | 0.998269 | 1.062527 | 0.869043 |
|                |                   | K23R | 1.456494            | 1.726081 | 1.85639  | 1.518345 |
|                | ZnO NPs           | WT   | 0.667806            | 0.684205 | 0.753929 | 0.75132  |
|                |                   | K23R | 0.977725            | 1.174869 | 1.207899 | 1.220523 |
|                | ZnSO <sub>4</sub> | WT   | 1.481953            | 1.250496 | 1.19127  | 1.397163 |
|                |                   | K23R | 2.458026            | 2.475123 | 2.518387 | 2.333507 |
| <i>cpt1a2a</i> | Control           | WT   | 1.172835            | 0.986233 | 0.933033 | 0.926588 |
|                |                   | K23R | 1.201636            | 1.301342 | 1.510473 | 1.69937  |
|                | ZnO NPs           | WT   | 0.697372            | 0.72951  | 0.792784 | 0.812252 |
|                |                   | K23R | 1.172835            | 1.053361 | 1.136817 | 1.042466 |
|                | ZnSO <sub>4</sub> | WT   | 1.231144            | 1.261377 | 1.21841  | 1.489677 |

|               |                   |      |          |          |          |          |
|---------------|-------------------|------|----------|----------|----------|----------|
|               |                   | K23R | 2.219139 | 2.17347  | 1.925189 | 1.735077 |
|               | Control           | WT   | 1.019244 | 0.957603 | 1.005212 | 1.019244 |
|               |                   | K23R | 1.267952 | 1.411765 | 1.321796 | 1.103816 |
| <i>acadsb</i> | ZnO NPs           | WT   | 0.816486 | 0.743549 | 0.733312 | 0.767107 |
|               |                   | K23R | 0.857079 | 0.684205 | 0.674785 | 0.645058 |
|               | ZnSO <sub>4</sub> | WT   | 1.392329 | 1.744121 | 1.843567 | 1.518345 |
|               |                   | K23R | 1.431473 | 1.513092 | 1.111494 | 1.638641 |
| <i>acca</i>   | Control           | WT   | 1.160704 | 1.010451 | 0.982821 | 0.867539 |
|               |                   | K23R | 0.566442 | 0.626332 | 0.678302 | 0.582367 |
|               | ZnO NPs           | WT   | 1.479388 | 1.453973 | 1.591073 | 1.438934 |
|               |                   | K23R | 1.031683 | 1.214195 | 1.356604 | 1.287882 |
| <i>fas</i>    | ZnSO <sub>4</sub> | WT   | 0.776469 | 0.768438 | 0.707107 | 0.80107  |
|               |                   | K23R | 0.534033 | 0.643941 | 0.812252 | 0.562529 |
|               | Control           | WT   | 1.125058 | 1.006956 | 0.913831 | 0.965936 |
|               |                   | K23R | 0.82645  | 0.673617 | 0.690159 | 1.082975 |
| <i>elov6</i>  | ZnO NPs           | WT   | 1.840375 | 1.747146 | 2.034959 | 1.164734 |
|               |                   | K23R | 1.117287 | 0.898132 | 0.929805 | 0.97942  |
|               | ZnSO <sub>4</sub> | WT   | 0.82932  | 1.270151 | 0.82645  | 0.750019 |
|               |                   | K23R | 0.673617 | 0.598739 | 0.545254 | 0.662044 |
| <i>ppara</i>  | Control           | WT   | 1.055188 | 1.055188 | 0.912249 | 0.984525 |
|               |                   | K23R | 0.934651 | 1.14671  | 0.921784 | 1.19127  |
|               | ZnO NPs           | WT   | 1.237561 | 1.387512 | 1.507857 | 1.229013 |
|               |                   | K23R | 1.154686 | 1.387512 | 1.539541 | 1.354256 |
| <i>ppara</i>  | ZnSO <sub>4</sub> | WT   | 0.597703 | 0.651799 | 0.670124 | 0.629597 |
|               |                   | K23R | 0.606046 | 0.645058 | 0.660898 | 0.836536 |
|               | Control           | WT   | 1.058851 | 1.001734 | 1.022783 | 0.921784 |
|               |                   | K23R | 0.893475 | 0.921784 | 1.555631 | 1.263565 |
| <i>ppara</i>  | ZnO NPs           | WT   | 0.354167 | 0.298851 | 0.355396 | 0.291688 |
|               |                   | K23R | 0.387562 | 0.373065 | 0.373065 | 0.349291 |

|                   |      |          |          |          |          |
|-------------------|------|----------|----------|----------|----------|
| ZnSO <sub>4</sub> | WT   | 0.718221 | 0.672451 | 1.14671  | 1.237561 |
|                   | K23R | 1.19127  | 1.001734 | 1.012204 | 0.931418 |

---

**Fig. S1**

**Fig. S1A**

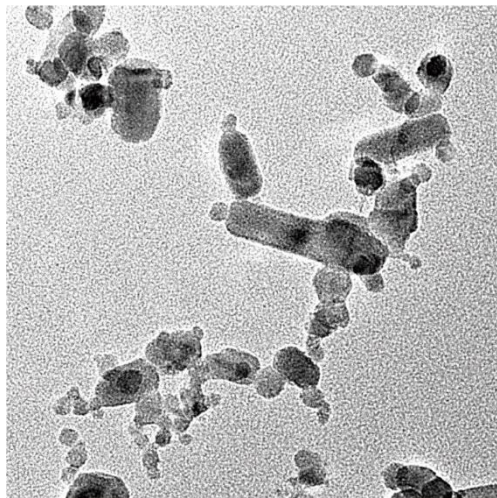

**Fig. S1B**

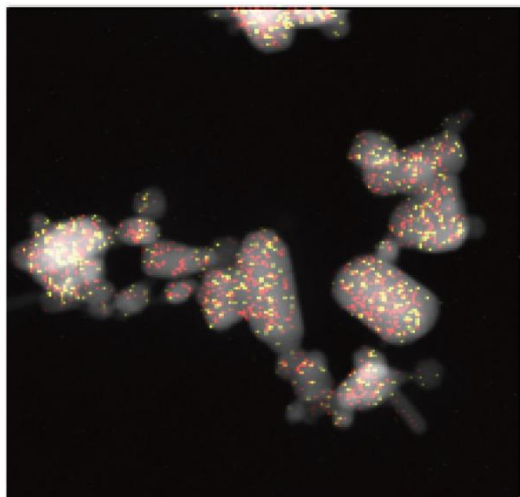

**Fig. S1C**

|                          | Size (d. nm)  | % Intensity | St Dev (d. nm) |
|--------------------------|---------------|-------------|----------------|
| Z-Average (d. nm): 147.7 | Peak 1: 168.4 | 99.0        | 69.86          |
| PdI: 0.170               | Peak 2: 4979  | 1.0         | 620.0          |
| Intercept: 0.959         | Peak 3: 0.000 | 0.0         | 0.000          |

Result quality: Good

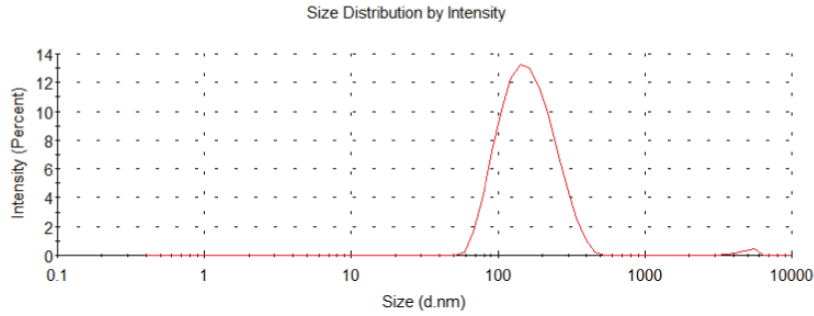

**Fig. S1D**

|                              | Mean (mV)    | Area (%) | St Dev (mV) |
|------------------------------|--------------|----------|-------------|
| Zeta Potential (mV): 30.8    | Peak 1: 30.8 | 100.0    | 3.73        |
| Zeta Deviation (mV): 3.73    | Peak 2: 0.00 | 0.0      | 0.00        |
| Conductivity (mS/cm): 0.0686 | Peak 3: 0.00 | 0.0      | 0.00        |

Result quality: Good

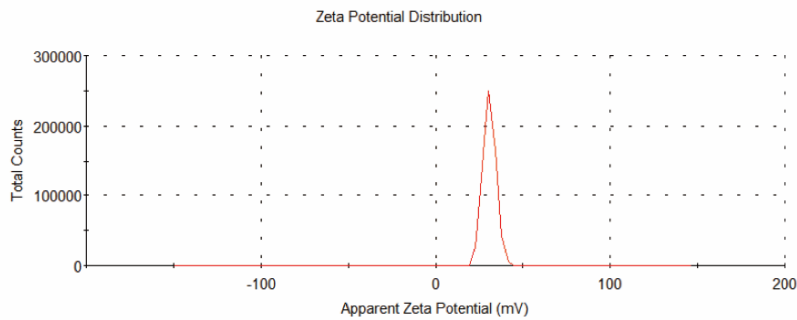

**Fig. S2**

**Fig. S2A**

|         | Control  |         | ZnO NPs  |          |          | ZnSO <sub>4</sub> |          |          |          |
|---------|----------|---------|----------|----------|----------|-------------------|----------|----------|----------|
| Zn      |          |         |          |          |          |                   |          |          |          |
| content | 39.91454 | 39.4719 | 37.74343 | 49.31817 | 56.65319 | 53.86408          | 41.51663 | 43.68898 | 43.85137 |

**Fig. S2B**

|              | Control  |          |          | ZnO NPs  |          |          | ZnSO <sub>4</sub> |          |          |
|--------------|----------|----------|----------|----------|----------|----------|-------------------|----------|----------|
| <i>znt1</i>  | 1.241141 | 0.97041  | 0.830278 | 0.97041  | 1.073012 | 1.076738 | 1.358172          | 1.538652 | 1.377132 |
| <i>znt4</i>  | 1.168777 | 0.986233 | 0.867539 | 1.580083 | 1.270151 | 1.292353 | 0.724471          | 0.976032 | 0.962594 |
| <i>znt5</i>  | 1.026927 | 1.052145 | 0.925518 | 1.477679 | 1.229723 | 1.251218 | 1.139447          | 1.041262 | 0.944965 |
| <i>znt6</i>  | 1.131576 | 0.99539  | 0.887816 | 1.104454 | 1.163389 | 0.941696 | 1.204416          | 1.012789 | 1.108288 |
| <i>znt7</i>  | 1.019833 | 1.104454 | 0.887816 | 0.728668 | 1.246889 | 1.217004 | 0.80571           | 1.171481 | 1.09303  |
| <i>znt8</i>  | 0.99654  | 1.013959 | 0.989657 | 1.180993 | 0.898132 | 1.071773 | 0.588453          | 0.568408 | 1.046085 |
| <i>znt9</i>  | 1.30586  | 1.22264  | 0.626332 | 1.231144 | 1.235419 | 1.086735 | 1.500039          | 1.075494 | 1.176907 |
| <i>znt10</i> | 0.953739 | 1.186463 | 0.883723 | 1.076738 | 0.665111 | 0.605696 | 1.150026          | 1.293847 | 1.150026 |

**Fig. S2C**

|              | Control  |          |          | ZnO NPs  |          |          | ZnSO <sub>4</sub> |          |          |
|--------------|----------|----------|----------|----------|----------|----------|-------------------|----------|----------|
| <i>zip1</i>  | 1.126359 | 1.04006  | 0.85362  | 1.004632 | 0.737987 | 0.735433 | 0.551589          | 0.575013 | 0.629233 |
| <i>zip4</i>  | 1.063141 | 1.002313 | 0.938438 | 0.718636 | 1.196096 | 1.112136 | 0.783678          | 1.131576 | 1.08548  |
| <i>zip5</i>  | 1.100633 | 1.044877 | 0.869545 | 0.99539  | 0.778265 | 0.708742 | 0.834124          | 0.925518 | 0.863539 |
| <i>zip6</i>  | 1.065601 | 0.990801 | 0.947151 | 1.0693   | 0.717806 | 0.730353 | 0.865537          | 0.732889 | 0.813191 |
| <i>zip7</i>  | 1.121166 | 0.97942  | 0.91067  | 1.071773 | 0.942785 | 1.853176 | 0.474671          | 0.505226 | 0.787308 |
| <i>zip8</i>  | 1.128964 | 1.101905 | 0.803851 | 0.946058 | 1.075494 | 1.729074 | 0.82645           | 0.898132 | 0.776469 |
| <i>zip9</i>  | 0.985094 | 1.016305 | 0.998845 | 0.848704 | 1.063141 | 1.447269 | 0.811315          | 0.686977 | 0.663576 |
| <i>zip10</i> | 1.185093 | 1.117287 | 0.755236 | 1.094294 | 1.121166 | 0.752623 | 1.209994          | 0.873573 | 0.744839 |
| <i>zip13</i> | 1.215598 | 0.943874 | 0.871557 | 0.777366 | 0.58304  | 0.437291 | 0.50406           | 0.521835 | 0.796456 |
| <i>zip14</i> | 1.16608  | 0.97716  | 0.877619 | 0.918064 | 0.980552 | 1.146047 | 1.339474          | 1.001156 | 0.74312  |

**Fig. S3**

**Fig. S3A**

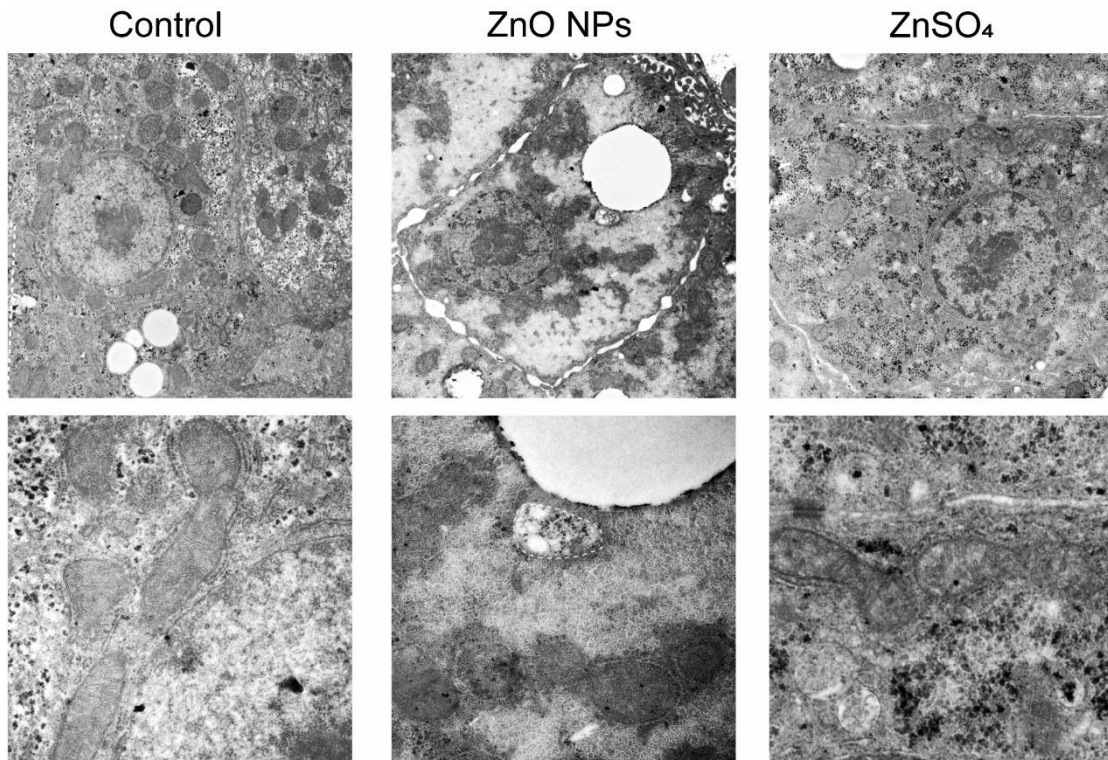

**Fig. S3B**

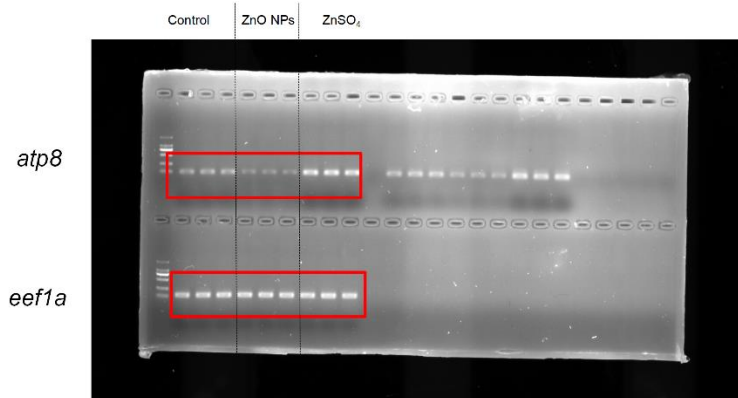

**Fig. S3C**

| Control  |          | ZnO NPs  |          |          | ZnSO <sub>4</sub> |          |          |          |
|----------|----------|----------|----------|----------|-------------------|----------|----------|----------|
| 1.028114 | 1.021012 | 0.952638 | 0.655197 | 0.742262 | 0.737135          | 2.234574 | 2.250117 | 2.188587 |

**Fig. S3D**

| Control  |          |          | ZnO NPs  |          |          | ZnSO <sub>4</sub> |          |          |
|----------|----------|----------|----------|----------|----------|-------------------|----------|----------|
| 81.94566 | 117.2979 | 100.7564 | 38.20949 | 56.17136 | 48.18563 | 138.8003          | 142.8649 | 125.5621 |

**Fig. S3E**

| Control  |          |          | ZnO NPs  |          |         | ZnSO <sub>4</sub> |          |          |
|----------|----------|----------|----------|----------|---------|-------------------|----------|----------|
| 15.78914 | 13.44038 | 20.30551 | 9.375015 | 9.290799 | 10.2976 | 33.7514           | 26.04105 | 31.94291 |

**Fig. S4**

| Cell viability, % |          |          |          |          |          |          |
|-------------------|----------|----------|----------|----------|----------|----------|
| 0                 | 87.33929 | 87.52355 | 102.8171 | 107.6284 | 101.8754 | 100.1556 |
| 0.2               | 107.2394 | 109.2867 | 90.41029 | 109.3072 | 95.54909 | 92.8671  |
| 0.4               | 95.63099 | 93.58366 | 96.20424 | 91.31112 | 93.84981 | 109.471  |
| 0.6               | 106.359  | 100.217  | 93.25608 | 90.12366 | 85.92663 | 97.43264 |
| 0.8               | 95.65147 | 91.5568  | 105.1306 | 84.7187  | 94.46401 | 88.67006 |
| 1                 | 106.6252 | 94.34117 | 99.95087 | 83.98165 | 83.65409 | 93.21511 |

**Fig. S5**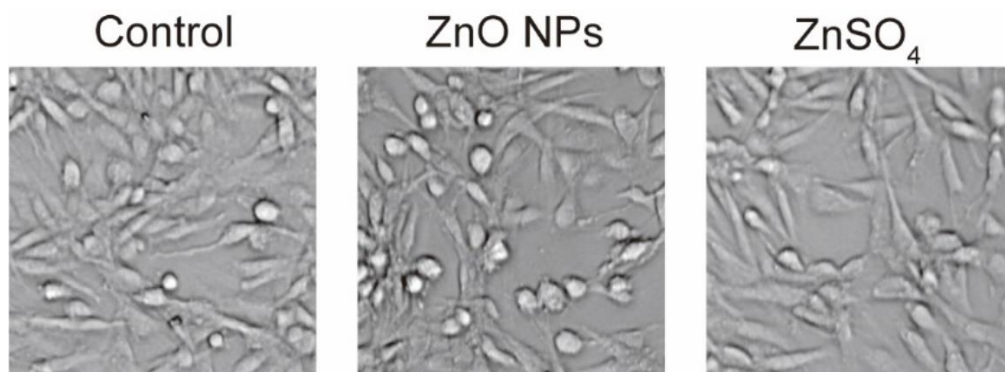



**Fig. S6**

|               | Control  |          |          | ZnO NPs  |          |          | ZnSO <sub>4</sub> |          |          |
|---------------|----------|----------|----------|----------|----------|----------|-------------------|----------|----------|
| <i>hdac1</i>  | 1.046085 | 1.006956 | 0.949342 | 0.926588 | 0.91067  | 0.986233 | 1.563739          | 1.652901 | 1.71119  |
| <i>hdac3</i>  | 1.0693   | 0.963707 | 0.97041  | 1.211393 | 0.850667 | 0.990801 | 1.773583          | 1.481098 | 1.632029 |
| <i>hdac4</i>  | 1.152686 | 0.939523 | 0.923382 | 0.615572 | 0.635075 | 0.619854 | 0.843816          | 0.923382 | 0.849685 |
| <i>hdac5</i>  | 1.057018 | 1.028114 | 0.920188 | 1.125058 | 1.086735 | 0.913831 | 0.870551          | 0.888843 | 0.812252 |
| <i>hdac6</i>  | 1.132884 | 0.993092 | 0.888843 | 0.946058 | 0.888843 | 0.726986 | 1.248331          | 1.239708 | 1.42405  |
| <i>hdac7</i>  | 1.407694 | 0.866537 | 0.819794 | 1.54043  | 1.159364 | 1.183724 | 1.167428          | 1.208597 | 1.286395 |
| <i>hdac8</i>  | 1.030492 | 1.066832 | 0.909618 | 0.749154 | 0.643197 | 0.571701 | 1.225468          | 1.200249 | 1.259921 |
| <i>hdac9</i>  | 1.086735 | 1        | 0.920188 | 1.156688 | 0.858565 | 0.840896 | 0.946058          | 1.248331 | 1.172835 |
| <i>hdac10</i> | 1.307369 | 0.886791 | 0.862542 | 1.420764 | 1.154019 | 1.076738 | 1.512219          | 1.307369 | 1.430646 |
| <i>hdac11</i> | 1.098093 | 0.965936 | 0.942785 | 0.870551 | 0.898132 | 1.464086 | 1.30586           | 1.370783 | 0.99654  |
| <i>hdac12</i> | 1.302846 | 0.89296  | 0.859558 | 0.937354 | 0.940609 | 0.983957 | 1.224054          | 1.293847 | 1.110852 |

**Fig. S7****Fig. S7A-B**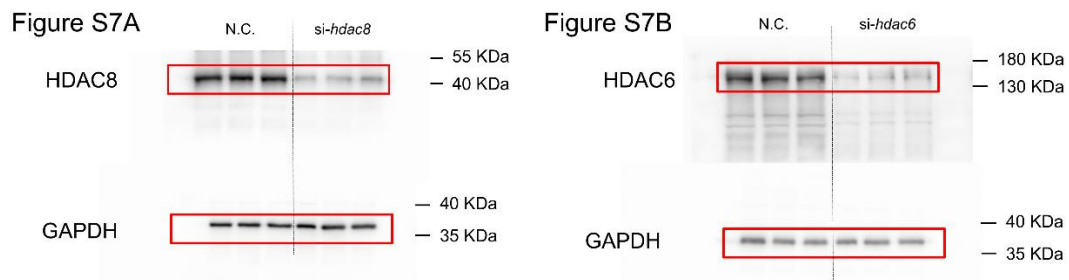**Fig. S7C**

|                           | Relative <i>hdac8</i> expression |          |          |          |
|---------------------------|----------------------------------|----------|----------|----------|
| Control                   | 1.077733                         | 1.033831 | 0.964598 | 0.918913 |
| ZnO NPs                   | 0.848508                         | 0.670356 | 0.672684 | 0.531448 |
| <i>si-hdac8</i>           | 0.157454                         | 0.31165  | 0.175921 | 0.332863 |
| ZnO NPs + <i>si-hdac8</i> | 0.389043                         | 0.184667 | 0.150517 | 0.146401 |

**Fig. S7D**

|                                     | Relative <i>hdac6</i> expression |          |          |          |
|-------------------------------------|----------------------------------|----------|----------|----------|
| Control                             | 1.066586                         | 1.092778 | 1.023137 | 0.839731 |
| ZnSO <sub>4</sub>                   | 1.422077                         | 1.412254 | 1.929196 | 1.91587  |
| <i>si-hdac6</i>                     | 0.269433                         | 0.319303 | 0.271307 | 0.25139  |
| ZnSO <sub>4</sub> + <i>si-hdac6</i> | 0.483974                         | 0.381036 | 0.529609 | 0.387697 |
