# Supplementary material for: Differential effects of two Zn sources (ZnO nanoparticles and ZnSO4) on lipid metabolism via the ferroptosis pathway and SLC7A11K23 acetylation by HDAC8 and HDAC6 in a freshwater teleost
Source: Royal Society of Chemistry journal article supplement (doi:10.1039/d4en00239c), 2024-01-01
Supplement: d4en00239c2.pdf [file d4en00239c2.pdf]

---

## Supporting Information

### **Two Zn sources (ZnO nanoparticles and ZnSO<sub>4</sub>) differentially affect lipid metabolism via ferroptosis pathway and SLC7A11<sup>K23</sup> acetylation by HDAC8 and HDAC6 in a freshwater teleost**

Yi-Chuang Xu,<sup>‡a</sup> Hua Zheng,<sup>‡a</sup> Xiao-Ying Tan,<sup>a</sup> Christer Hogstrand,<sup>c</sup> Tao Zhao,<sup>a</sup> Xiao-Lei Wei<sup>a</sup> and Zhi Luo<sup>\*ab</sup>

<sup>a</sup>Hubei Hongshan Laboratory, Fishery College, Huazhong Agricultural University, Wuhan 430070, China

<sup>b</sup>Laboratory for Marine Fisheries Science and Food Production Processes, Qingdao National Laboratory for Marine Science and Technology, Qingdao 266237, China

<sup>c</sup>Diabetes and Nutritional Sciences Division, School of Medicine, King's College London, Franklin-Wilkins Building, 150 Stamford Street, London SE1 9NH, UK

\*Corresponding author at: Zhi Luo, Hubei Hongshan Laboratory, Fishery College, Huazhong Agricultural University, Wuhan 430070, China, Tel.: +86-27-8728-2113; Fax: +86-27-8728-2114;

E-mail address: luozhi99@mail.hzau.edu.cn; luozhi99@aliyun.com (Z. Luo).

<sup>‡</sup> These two authors contributed equally.

---

**Abbreviations:**

ACCa, acetyl-CoA carboxylase a; acad, acyl-CoA dehydrogenase; ACSL, acyl-CoA synthetase long chain family member; ATGL, adipose triglyceride lipase; CBS, cystathionine beta-synthase; CF, Condition factor; CPT 1, carnitine palmitoyltransferase 1; CTH, cystathionine gamma-lyase; ELOVL6, ELOVL fatty acid elongase 6; DMEM, Dulbecco's Modified Eagle's medium; FAS, fatty acid synthase; FBS, fetal bovine serum; FBW, final mean body weight; FCR, feed conversion rate; FSP1, Ferroptosis suppressor protein 1; GCLC, glutamate-cysteine ligase catalytic subunit; GCLM, glutamate-cysteine ligase regulator subunit; GPX, glutathione peroxidase; GSR, glutathione reductase; GSS, Glutathione synthetase; GSSG, glutathione disulfide; GST, glutathione S-transferase; H&E, Hematoxylin and eosin; HDAC, histone deacetylase; HEK-293, human embryonic kidney 293 cell; HSL, hormone-sensitive lipase; LDs, lipid droplets; MTF-1, metal response element binding transcription factor 1; NAFLD, non-alcoholic fatty liver disease; NEFA, non-esterified free fatty acids; ORO, Oil red O; ORFs, open reading frames; PPARA, peroxisome proliferator activated receptor alpha; PTGS2, prostaglandin G/H synthase 2; qRT-PCR, Real-time quantitative PCR; RPMI, Roswell Park Memorial Institute; SGR, specific growth rate; SDS, sodium dodecyl sulfate; siRNA, small interference RNA; SLC7A11, solute carrier family 7 member 11; VSI, viscerosomatic index; WG, weight gain.

**Text S1****Animals feeding, management, and sampling**

In this study, a total of 180 juvenile grass carp with a uniform size (initial mean weight:  $3.54 \pm 0.00$ g, mean  $\pm$  S.E.M.) were randomly allocated to nine 300-L circular aquariums, with 20 fish per tank. Each experimental diet was assigned to three replicate tanks, and the fish were fed to satiation twice daily over a period of 8 weeks. Throughout the feeding experiment, water temperature, dissolved oxygen, NH<sub>4</sub>-N, nitrite, and Zn levels were regularly monitored. The water temperature was maintained

---

within the range of 28.7 - 29.3°C, dissolved oxygen levels were kept at  $\geq 5.8$  mg L<sup>-1</sup>, NH<sub>4</sub>-N levels remained below 0.09 mg L<sup>-1</sup>, nitrite levels were below 0.01 mg L<sup>-1</sup>, and Zn concentration in the water was  $0.04 \pm 0.00$  mg L<sup>-1</sup>.

Feeding experiment lasted for 8 weeks. Then, 12 fish were selected randomly from each tank, and their liver was isolated on ice, and fixed in 4% buffered formalin solution for histological analysis or 2.5% glutaraldehyde solution for ultrastructural observation. The liver samples from other fish were frozen quickly in liquid nitrogen and then kept in a -80°C freezer for analysis of Zn levels, TG and NEFA contents, enzymatic activities, mRNA and protein abundance.

## **Text S2**

### **Histological and ultrastructural observation**

To perform ORO staining, liver tissues were frozen at -25°C and sectioned into 5 µm thick slices after sucrose-induced dehydration. The sections were then stained with oil-saturated O solutions and subsequently washed twice with 60% isopropanol. Being washed twice in distilled water and sealed with glycerin jelly, the sections were imaged under a light microscope (Olympus BX53, Tokyo, Japan). Image J software (NIH, Bethesda, MD, USA) was utilized to analyze the relative areas of lipid droplets (LDs) in the ORO staining.

For H&E staining, the samples were sectioned into 5-µm thick slices. The sections were then stained with H&E dye, undergoing a process of dehydration in graded ethanol concentrations, and finally embedded in paraffin. The sections were imaged under a light microscope (Olympus BX53, Tokyo, Japan).

For TEM observation, the samples underwent a series of preparation steps. Firstly, they were postfixated in a solution of 1% osmium tetroxide in sodium cacodylate. Then, the samples were treated with 1% uranyl acetate, dehydrated using ethanol, and embedded in resin. Subsequently, the samples were stained with uranyl acetate and lead citrate. The prepared grids were examined using a FEI Tecnai G<sup>2</sup> 20 TWIN

---

transmission electron microscope operating at an acceleration voltage of 200 kV.

### **Text S3**

#### **Immunoblot and immunoprecipitation**

For immunoblot analysis, the samples were lysed in RIPA buffer (#P0013B, Beyotime Biotechnology) supplemented with a protease, phosphatase inhibitor cocktail (#P1045, Beyotime Biotechnology), and deacetylase inhibitor cocktail (#P1112, Beyotime Biotechnology). Protein samples were loaded onto SDS-polyacrylamide gels and subsequently transferred to polyvinylidene fluoride (PVDF) membranes. The membranes were blocked with 4% bovine serum albumin (BSA, #ST023, Beyotime Biotechnology) for 1 hour at room temperature. Primary antibodies were incubated with the membranes overnight at 4 °C. Subsequently, the membranes were treated with the appropriate secondary antibodies. After thorough washing, the membranes were visualized using ECL (#P0018FS, Beyotime Biotechnology).

For immunoprecipitation assays, the samples were lysed using NP-40 lysis solution (#P0013F, Beyotime Biotechnology) supplemented with a protease and deacetylase inhibitor cocktail (#P1112, Beyotime Biotechnology). After incubation with the required antibodies overnight at 4 °C, protein A/G magnetic beads (#HY-K0202, Med Chem Express, New Jersey, USA) were added. The immunocomplexes were then washed using NP-40 lysis buffer, and subsequent immunoblot experiments were performed.

### **Text S4**

#### **Plasmid construction**

ClonExpress™ II One Step Cloning Kit (#C112, Vazyme, Piscataway, NJ, USA) was employed to subclone the open reading frames (ORFs) of SLC7A11, HDAC6, and HDAC8 sequences into pcDNA3.1 (+) vector with GFP-tag, HA-tag, and 6×His -tag sequences, respectively. Mutations in SLC7A11 were conducted using the Mut Express

---

II Fastmutagensis Kit (#C214, Vazyme). The ORFs of HDAC3 and HDAC8 were subcloned into the pGEX-6P-1 vector for prokaryotic expression.

## **Text S5**

### **Cystine uptake assay**

Cells were seeded in 6-well plates at an optimal confluency. After the respective treatment, the cells were washed three times with PBS at room temperature. Subsequently, the cells were pre-incubated in 1 ml cystine uptake buffer (0.4 mM MgSO<sub>4</sub>, 1.8 mM KCl, 1.3 mM CaCl<sub>2</sub>, 25 mM triethylammonium bicarbonate, 122 mM choline chloride, 1.2 mM potassium phosphate, 10 mM glucose, pH7.4) for 15 min. Following the pre-incubation, 1 μM L-cystine was added, and the cells were further incubated at 37 °C for 1 h. Next, 500 μl of the uptake buffer was collected from each well and centrifuged at 14,000 rpm for 2 minutes. The cystine concentration was determined using a customized kit from Shanghai Enzyme-linked Biotechnology Co., Ltd. (Shanghai, China), and the values were normalized to cell counts from each well.

**Table S1.** Feed formulation and proximate analysis (% dry matter).

| Ingredients (g kg <sup>-1</sup> )                                  | Control | ZnO NPs | ZnSO <sub>4</sub> |
|--------------------------------------------------------------------|---------|---------|-------------------|
| Fish meal                                                          | 80      | 80      | 80                |
| casein                                                             | 35      | 35      | 35                |
| Rice bran                                                          | 110     | 110     | 110               |
| Soybean meal                                                       | 200     | 200     | 200               |
| Rapeseed meal                                                      | 250     | 250     | 250               |
| Wheat Starch                                                       | 250     | 250     | 250               |
| Fish oil                                                           | 20      | 20      | 20                |
| Soybean oil                                                        | 10      | 10      | 10                |
| Choline chloride                                                   | 1.5     | 1.5     | 1.5               |
| Lecithin                                                           | 1       | 1       | 1                 |
| Vitamin premix                                                     | 4       | 4       | 4                 |
| Mineral premix                                                     | 7.5     | 7.5     | 7.5               |
| DL-methionine                                                      | 0.15    | 0.15    | 0.15              |
| L-lysine                                                           | 0.4     | 0.4     | 0.4               |
| L-threonine                                                        | 0.4     | 0.4     | 0.4               |
| Ca(H <sub>2</sub> PO <sub>4</sub> ) <sub>2</sub> ·H <sub>2</sub> O | 20      | 20      | 20                |
| Cellulose                                                          | 10.05   | 10.008  | 9.9               |
| ZnO NPs                                                            |         | 0.042   |                   |
| ZnSO <sub>4</sub> ·7H <sub>2</sub> O                               |         |         | 0.150             |
| Proximate analysis %, dry weight                                   |         |         |                   |
| Moisture                                                           | 8.65    | 8.43    | 8.57              |
| Crude protein                                                      | 30.79   | 31.09   | 30.82             |
| Crude lipid                                                        | 6.80    | 6.63    | 6.31              |
| Ash                                                                | 7.59    | 7.64    | 7.67              |
| Zn (mg kg <sup>-1</sup> )                                          | 57.36   | 81.12   | 81.09             |

Vitamin premix (mg or IU per kg diet): retinylacetate, 10000IU; cholecalciferol, 1000IU; all-rac-a-tocopheryl acetate, 30IU; menadione nicotinamide bisulfite, 7; thiamine hydrochloride, 6; riboflavin, 3; pyridoxine hydrochloride, 12; D-calcium pantothenate, 30; niacin, 50; biotin, 1; folic acid, 6; cyanocobalamine, 0.03.

Mineral mixture (mg per kg diet): NaCl, 500; FeSO<sub>4</sub>·7H<sub>2</sub>O, 400; MnSO<sub>4</sub>·H<sub>2</sub>O, 40; CuSO<sub>4</sub>·5H<sub>2</sub>O, 12; CaIO<sub>3</sub>·6H<sub>2</sub>O, 1.5; Na<sub>2</sub>SeO<sub>3</sub>, 0.45; CoSO<sub>4</sub>, 1.

**Table S2.** Primers used for quantitative real-time PCR (qRT-PCR) analysis.

| Genes                           | Forward primer (5'-3')    | Reverse primer (5'-3')    | Accession no. |
|---------------------------------|---------------------------|---------------------------|---------------|
| <i>acad11</i>                   | CGAACTGCTCTGTAT<br>GTGGC  | TCATTGGTTGGCAGG<br>TTGTG  | XM051882736   |
| <i>acadsb</i>                   | GAAGTTTGCTCAGGA<br>ACGCA  | GAGGGTGTTCCTGAAT<br>GTCGC | XM051913664   |
| <i>acca</i>                     | GCTTGCGGCGGTTAT<br>TACTG  | AGCTGCCTCTCCAAC<br>CATTC  | GU908474      |
| <i>acsl1a</i>                   | TACAGCTATTGCTCG<br>CCCAC  | CCAGTGCCTCTGACC<br>TTGAA  | MK929568      |
| <i>acsl4</i>                    | TGGACCTGAGTACCG<br>TTGTC  | AGGGTGTCTTTTCCA<br>GGGAG  | MK929567      |
| <i>atgl</i>                     | CGAGCTGTCTTCTGG<br>AGCAA  | AGGGCCAGATTACG<br>CTTTC   | HQ845211      |
| <i>atp8</i>                     | CCTCAACTAAACCCA<br>AACCCC | ATCATGGTCAGTCTC<br>AGGGC  | EU391390      |
| <i><math>\beta</math>-actin</i> | ACCCTGAAGTACCCC<br>ATCGA  | CAGAGGCATACAGG<br>GACAGC  | DQ211096      |
| <i>cbsa</i>                     | GGTGGAGGACATCAT<br>GGTGA  | AAGCAAGCATGTTTC<br>CCAGG  | XM051889812   |
| <i>cbsb</i>                     | GGATTCGACCAGATT<br>TGCCC  | GGATCTTGTTTCATGC<br>GGACC | XM051906005   |
| <i>cpt1a1b</i>                  | ACCATCCCCATGTGT<br>TCGTC  | CTGCTGCTCTATCTCC<br>CGTG  | KJ816748      |
| <i>cth</i>                      | AACGCCACAAACCC<br>TACTA   | TCAGCCGTTTCATAGA<br>GGTCC | XM051897977   |
| <i>elovl6</i>                   | TTTCTACAACGGACC<br>GGTCA  | CGGCATGCACCAGAT<br>AGTTC  | XM051860058   |
| <i>eef1a1</i>                   | GCCGATCTCACCAAC<br>CAATC  | TAACCTGTCCTGACC<br>AACCC  | NC067232      |
| <i>fsp1</i>                     | ATTGTCGGTGGTGGT<br>TTTGG  | AAGCACAACTGTCTG<br>CGTTT  | XM051917950   |
| <i>gapdh</i>                    | GGGAAACTGTGGAG            | TGCAGCCTTGACCAC           | GQ245759      |

---

|                | GGATGG                   | TTTCT                    |             |
|----------------|--------------------------|--------------------------|-------------|
| <i>gclc</i>    | CACGGCATCCTTCAG<br>TTCCT | GAGTAGGGTGGTTGG<br>GGTTG | XM051916883 |
| <i>gclm</i>    | TGTGGGAAGAGCTGG<br>AGAGT | TACTGCTCCCCTGTA<br>CTGCT | XM051901926 |
| <i>gpx4</i>    | GGGGTTACGTGTGCA<br>TCATC | AACTCCTTGATCTCC<br>GCCTC | XM051912906 |
| <i>gsr</i>     | GAACACTACACGTCC<br>AGGCA | TCACGTTGTCCTTTCC<br>CCAG | XM051860462 |
| <i>hsla</i>    | TGCTGAGCGTGTTTG<br>TTTGG | GGCAGCAGAGGGTC<br>GATTAA | HQ446238    |
| <i>ppara</i>   | CGAGCCTGTACAGTC<br>CCTTG | TGGACTAGATGCCGG<br>GGTTA | MZ727200    |
| <i>ptgs2</i>   | GCATTGCAGCCGAAT<br>TCAAC | AGCATTAACAGCCAC<br>TCCCT | XM051861202 |
| <i>slc7a11</i> | GAGCCCATCTTCATG<br>CCATG | AGTCTGCTGTGTTGA<br>CCTCA | XM051860495 |
| <i>srebp1</i>  | ACGGGGATGGGGAA<br>TACTCA | TTATCACCACGGCCA<br>CTGAC | KJ162572    |
| <i>zip1</i>    | CTAGATGAGGGCTTC<br>CCGCT | CATTCAACGAGTGCC<br>GTCCA | OP106599    |
| <i>zip4</i>    | TCTTGCGGGCGTCTA<br>TTTCT | AAGTTATGGATGCCG<br>TCGCC | OP106600    |
| <i>zip5</i>    | TTAGGTGATTTGGCG<br>GTGCT | TGGAGCATTTCGGGC<br>ATCAT | OP106601    |
| <i>zip6</i>    | GAAGGTTTGTCCAGC<br>GGTCT | CATACCCGCCTTCAG<br>CAAGA | OP106602    |
| <i>zip7</i>    | CCAGTGCAGTCAAAC<br>ACGGA | AGAGTGAGAGTGCG<br>AGTGTC | OP106603    |
| <i>zip8</i>    | AAAACGGCTCTCTGT<br>CCACG | ATTACCCAACCCAAA<br>GGCGG | OP106604    |
| <i>zip9</i>    | TCCAGAAGCAGCAAG<br>GACTG | AGCAGGAGCCTTATG<br>CAACA | OP106605    |



---

|              |                          |                          |          |
|--------------|--------------------------|--------------------------|----------|
| <i>zip10</i> | TTCTGGTGCCCATCC<br>TCAAC | CCTGCTAGTGCAGTC<br>AGTCC | OP106606 |
| <i>zip13</i> | ATCAGCCCTTACACA<br>GAGCC | TACGAGTGGCTTTCC<br>AACGG | OP106608 |
| <i>zip14</i> | GCGCTATGCCAACTC<br>CAATG | TAACATCCACCCGTT<br>CCAGC | OP106609 |
| <i>znt1</i>  | GCAACCCGATGTGGT<br>GATTG | GGCTGTTGTTGTGAT<br>TCCCG | OP106610 |
| <i>znt4</i>  | CTCAATCAGTCCGGG<br>CATCT | CACACCCTCCAGCAG<br>AATGA | OP106612 |
| <i>znt5</i>  | ATGTGCTGTCTGGTG<br>GAGTG | TGATGAAGCGAGGCA<br>GAGAC | OP106613 |
| <i>znt6</i>  | CGAGAGGAAAGTGTC<br>GCCTT | ACACCAGATTCAACA<br>CGCCA | OP106614 |
| <i>znt7</i>  | CGCTAGAACCCCTG<br>ATGTG  | TGTCCTCCATGTGAA<br>TGCCC | OP106615 |
| <i>znt8</i>  | GCCCAGAACGAGCA<br>GAAACT | CTGTAAAGATCGCCG<br>GAGGA | OP106616 |
| <i>znt9</i>  | TTGGCGTGGGTTTAT<br>ACGGG | GGCGATGTAACGCAT<br>GTTGG | OP106617 |
| <i>znt10</i> | ACTGGCTAAAGGACG<br>GAACG | CCACCAGGACAACAG<br>GAGAG | OP106618 |

---

**Abbreviation:** *acca*, acetyl-CoA carboxylase a; *acad*, acyl-CoA dehydrogenase; *acsl*, acyl-CoA synthetase long chain family member; *atgl*, adipose triglyceride lipase; *atp8*, ATP synthase F0 subunit 8; *cbs*, cystathionine beta-synthase; *cpt 1*, carnitine palmitoyl transferase 1; *cth*, cystathionine gamma-lyase; *dgat*, diacylglycerol O-acyltransferase; *elovl6*, ELOVL fatty acid elongase 6; *fas*, fatty acid synthase; *fsp1*, Ferroptosis suppressor protein 1; *gapdh*, glyceraldehyde-3-phosphate dehydrogenase; *gclc*, glutamate-cysteine ligase, catalytic subunit; *gclm*, glutamate-cysteine ligase, modifier subunit; *gpx*, glutathione peroxidase; *gsr*, glutathione reductase; *hsl*, hormone-sensitive lipase; *ppara*, peroxisome proliferator activated receptor alpha; *ptgs2*, prostaglandin G/H synthase 2; *slc7a11*, solute carrier family 7 member 11.

**Table S3.** siRNA sequences.

|                 | sense               | antisense          |
|-----------------|---------------------|--------------------|
| <i>si-hdac6</i> | GAGCUUCGCUGAUCUUUC  | AGAAAGAUCAGCGAAGCU |
|                 | UTT                 | CTT                |
| <i>si-hdac8</i> | GCACCAUCAAAAGGGAAUC | AGAUUCCCUUUGAUGGUG |
|                 | UTT                 | CTT                |

**Table S4.** Primers used for plasmid construction of expression vector.

|                                          | Forward primer (5'-3')                                | Reverse primer (5'-3')                                  |
|------------------------------------------|-------------------------------------------------------|---------------------------------------------------------|
| pcDNA3.1-<br>FL-SLC7A11                  | ctagcgtttaaacttaagcttATGCC<br>AGAAGGACTGTGTCA         | aacgggccctctagactcgagTCAC<br>AGATCCTCTTCAGAGATG<br>AGTT |
| pcDNA3.1-<br>HDAC6                       | cccctgggatccccggaattcATGG<br>ATCCTGTTCCAGTTTCCA       | gtcacgatgcgccgctcgagTTAA<br>GCGTAGTCTGGGACGTCG          |
| pcDNA3.1-<br>HDAC8                       | ctagcgtttaaacttaagcttGCCACC<br>ATGGTGCATCATCA         | aacgggccctctagactcgagCTAA<br>TGGTGATGGTGATGATGA<br>ACT  |
| pcDNA3.1-<br>SLC7A11<br>K12R             | AGTTCACATCCCagaGCG<br>GATCTGACTCCAAGTAAT<br>TTT       | CtctGGGATGTGGA<br>ACTGA<br>CACAGTCCTTCTG                |
| pcDNA3.1-<br>SLC7A11<br>K23R             | TTGGAGAGagaGACCCTCT<br>CAAATCAAATGGAGA                | AGGGTCtctCTCTCCAAAA<br>TACTTGGAGTCAGATC                 |
| pcDNA3.1-<br>SLC7A11<br>K27R             | CCCTCTCagaTCAAATGGA<br>GACTCCCACGCCG                  | CATTTGA<br>tctGAGAGGGTC<br>TTTCTCTCCAAAATTAC            |
| pcDNA3.1-<br>SLC7A11<br>K45R             | ACTGCGAagaAAGGTGAC<br>CCTGCTCCGAGGAA                  | TCACCTT<br>tctTCGCAGTTCC<br>ACCTTCTCCTCG                |
| pcDNA3.1-<br>SLC7A11 2-<br>46aa mutant   | TGAAGAGGATCTGGTGA<br>CCCTGCTCCGAGGAAT                 | GTCACCAGATCCTCTTCA<br>GAGATGAGTTTCTGC                   |
| pcDNA3.1-<br>SLC7A11<br>47-472<br>mutant | GTGGA<br>ACTGCGAAAGAA<br>GATCGAAAGAAAACCCA<br>AATGGTT | CTTCTTTCGCAGTTCCAC<br>CTTCTCCTCGGGGGC                   |

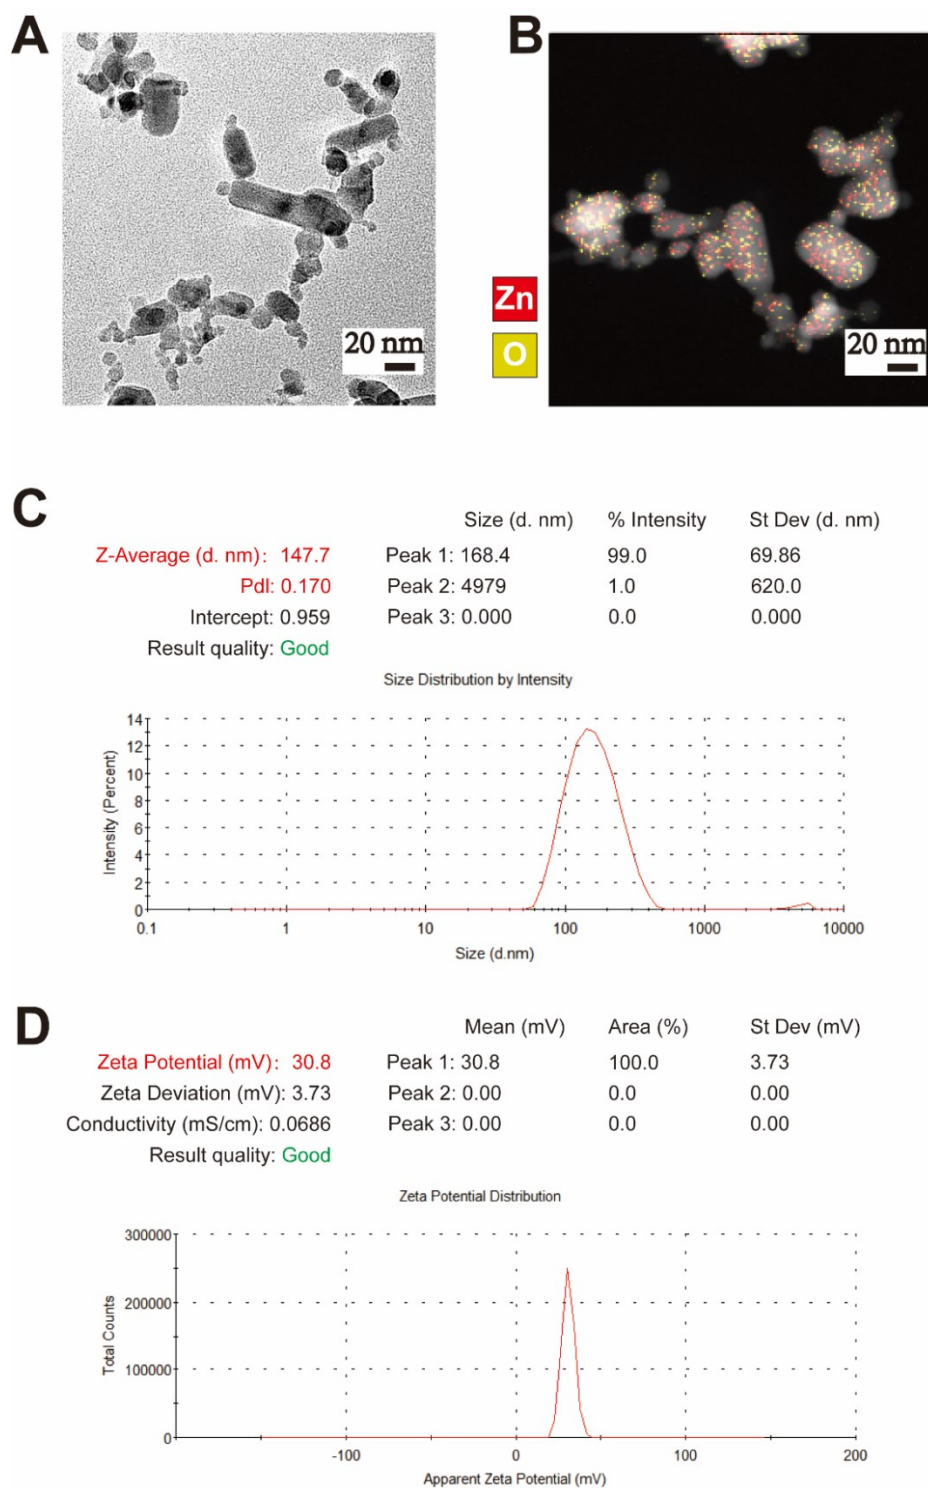

**Fig S1.** Particle characterization and physicochemical properties of ZnO NP. (A) Transmission electron microscopy (TEM) micrograph of the ZnO NP; (B) TEM elemental mapping image of the ZnO NP; (C) The intensity-weighted average hydrodynamic diameter in the distilled water of ZnO NP; (D) Zeta potential in the distilled water of ZnO NP.

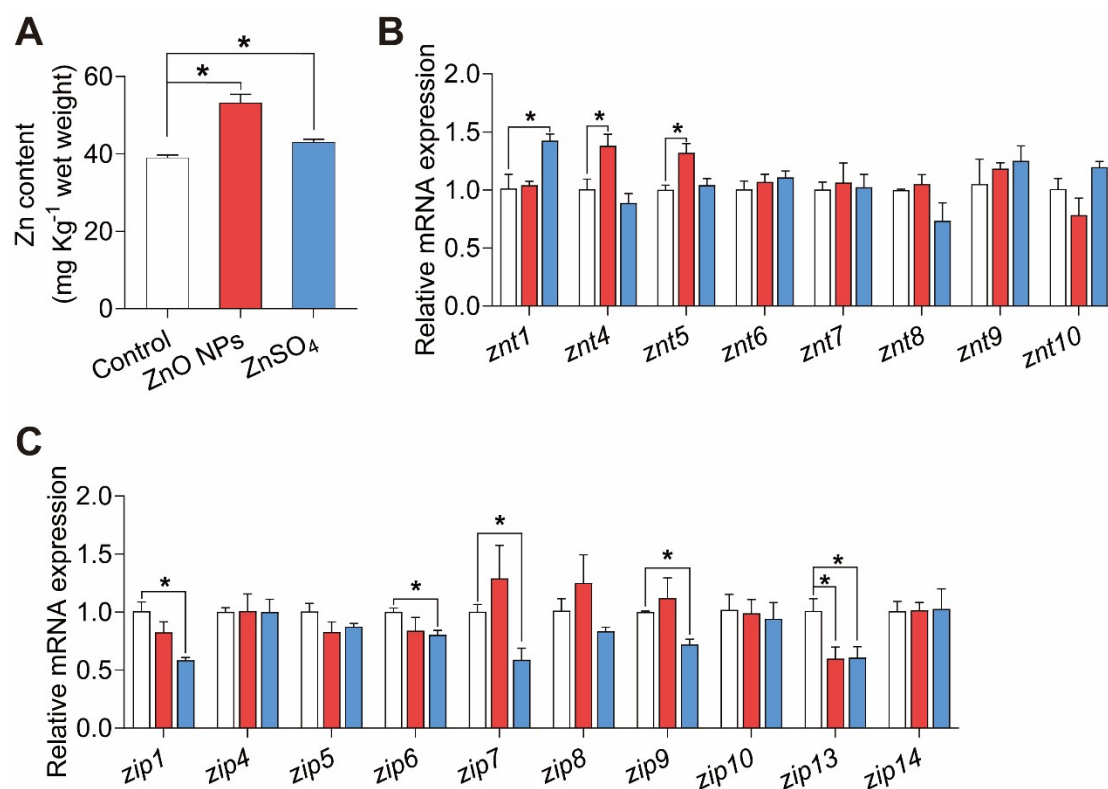

**Fig S2.** The effects of dietary ZnO NPs and ZnSO<sub>4</sub> on hepatic Zn metabolism. (A) Zn content; (B) The mRNA levels of ZnT family proteins; (C) The mRNA levels of ZIP family proteins. Results are presented as means  $\pm$  S.E.M. (n=3). Statistical analysis was performed by Student' *t*-test, \**P* < 0.05.

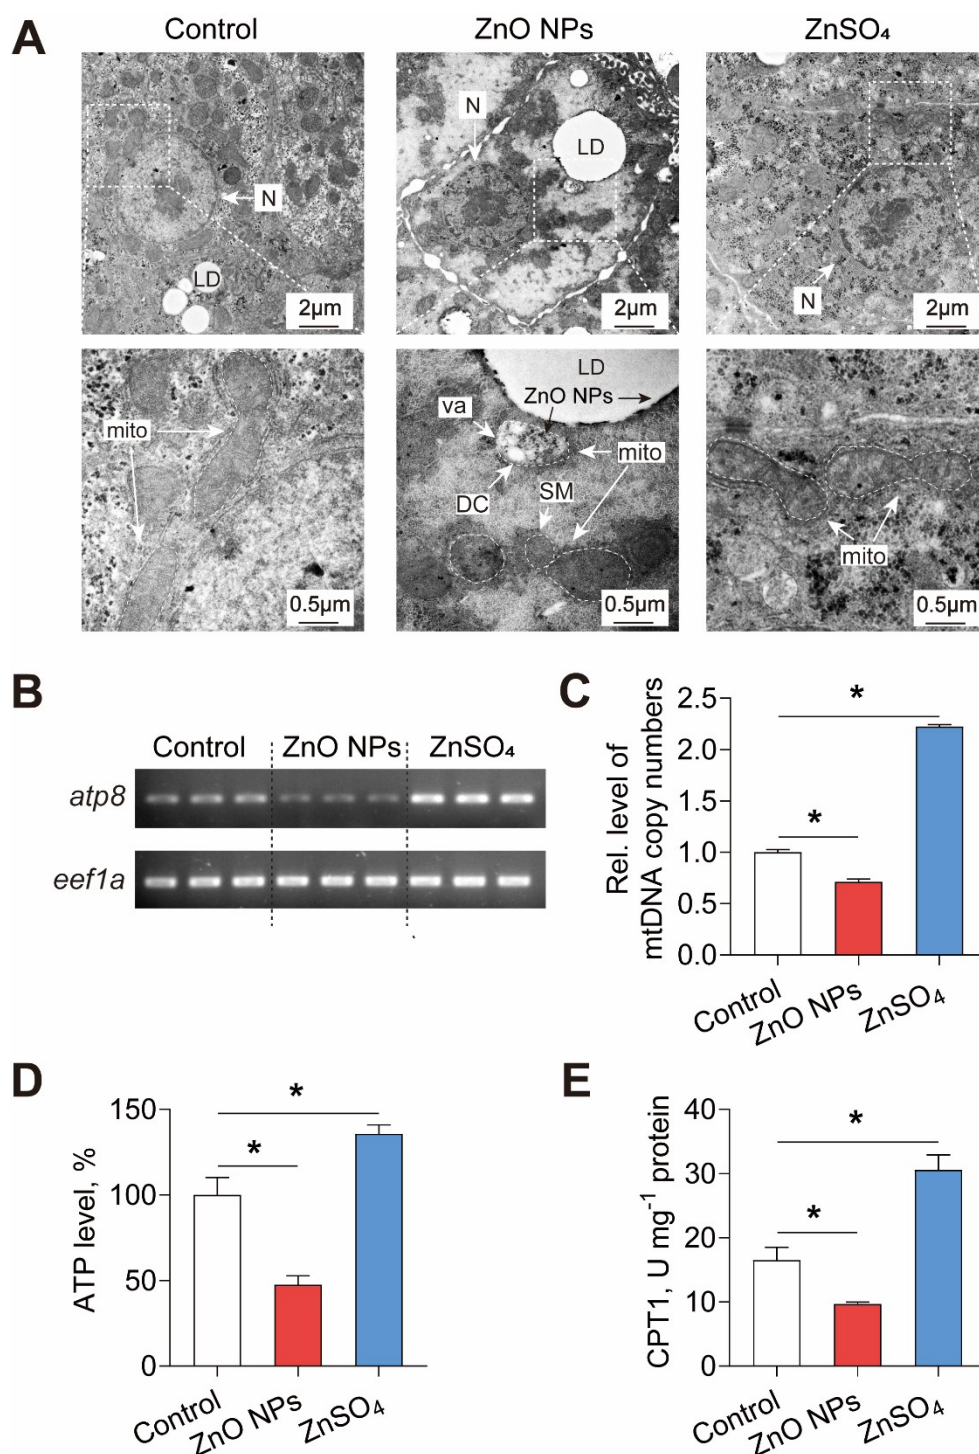

**Fig. S3.** Dietary ZnO NPs and ZnSO<sub>4</sub> influenced hepatic mitochondrial structure. (A) Representative hepatic TEM images. DC, disrupted cristae. LD, lipid droplet. mito, mitochondria. N, nucleus. SM, smaller size. va, vacuolation; (B) Semi-quantitative of mitochondrial-encoded gene *atp8*; (C) Relative level of mitochondrial copy number. Results are presented as means  $\pm$  S.E.M. (n=3). Statistical analysis was performed by Student' *t*-test, \**P* < 0.05.

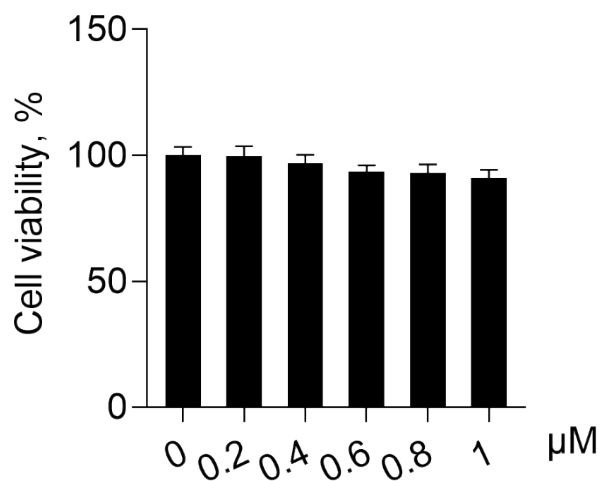

**Fig. S4.** Effects of Fer-1 concentration on the viability of L8824 cells. Results are presented as means  $\pm$  S.E.M. ( $n \geq 3$ ). Statistical analysis was performed by Student' *t*-test,  $*P < 0.05$ .

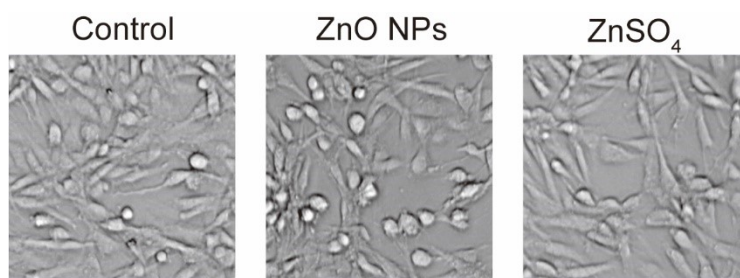

**Fig. S5.** Effects of ZnO NPs and ZnSO<sub>4</sub> exposure on the viability of L8824 cells.

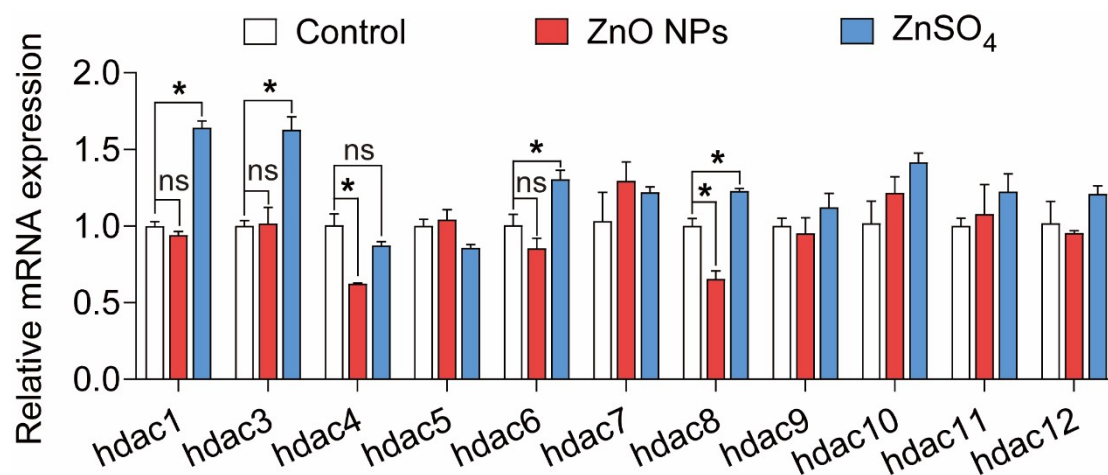

**Fig. S6.** Effects of ZnO NPs and ZnSO<sub>4</sub> on the mRNA expression of hepatic HDACs family genes. Results are presented as means  $\pm$  S.E.M. ( $n \geq 3$ ). Statistical analysis was performed by Student' *t*-test,  $*P < 0.05$ .



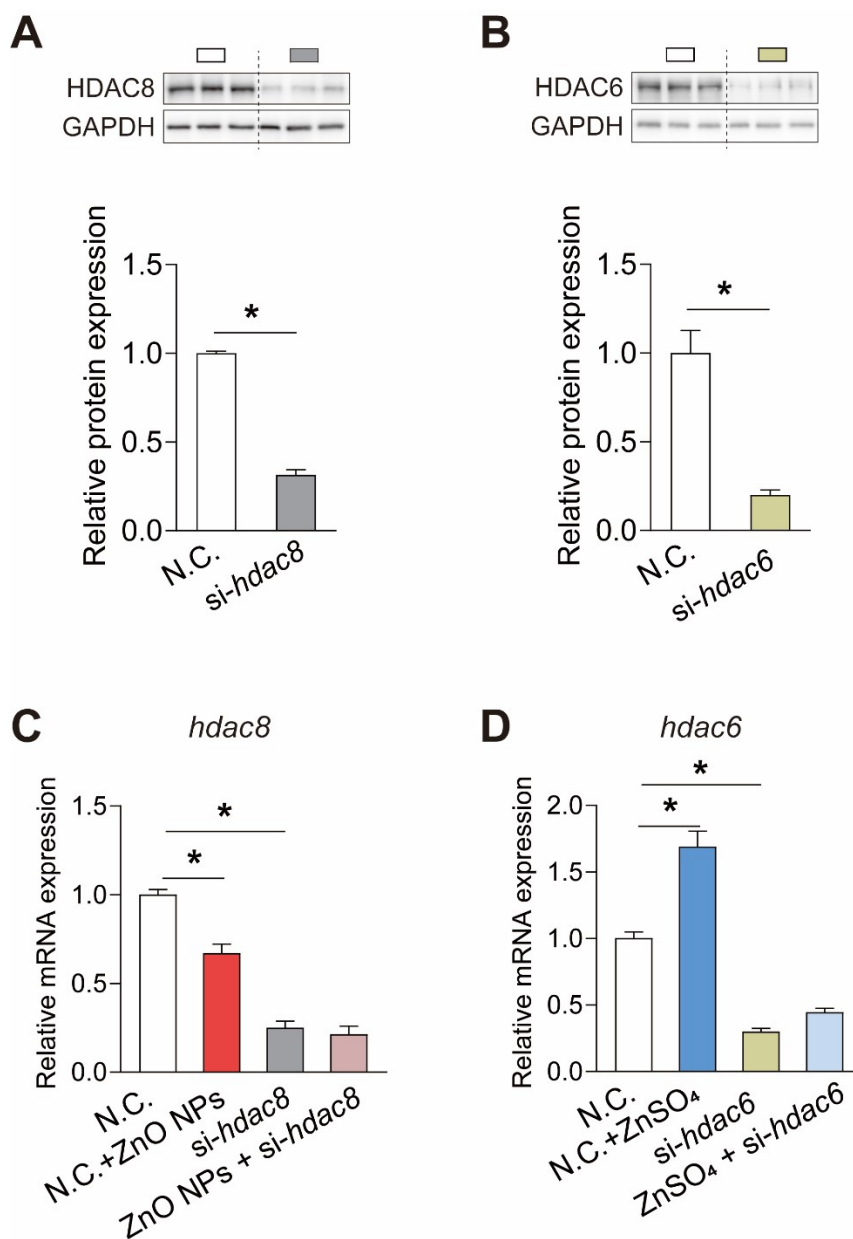

**Fig. S7.** The effect of si-*hdac8* and si-*hdac6* on the expression of HDAC8 and HDAC6, respectively. (A) Western blot and statistical analysis of HDAC8. L8824 cells were treated with or without si-*hdac8* for 48 h; (B) Western blot and statistical analysis of HDAC6, L8824 cells were treated with or without si-*hdac6* for 48 h; (C) The *hdac8* mRNA expression. L8824 cells were treated with ZnO NPs and/or si-*hdac8* for 48 h; (D) The *hdac6* mRNA expression. L8824 cells were treated with ZnSO<sub>4</sub> and/or si-*hdac6* for 48 h. Results are presented as means  $\pm$  S.E.M. ( $n \geq 3$  independent biological replicates). Statistical analysis was performed by Student' *t*-test, \* $P < 0.05$ .
